# 1 **Inhibitory interneurons distribute widely across the mouse thalamus and form** 2 **ontogenetic spatial clusters**

3

4 Polona Jager<sup>1</sup>, Padraic Calpin<sup>2</sup>, Xhuljana Durmishi<sup>1</sup>, Tomomi Shimogori<sup>3</sup>, Alessio Delogu<sup>1\*</sup>

5 <sup>1</sup> Department of Basic and Clinical Neuroscience, Institute of Psychiatry, Psychology and  
6 Neuroscience, King's College London, London, UK

7 <sup>2</sup> Department of Physics and Astronomy, University College London, London, UK

8 <sup>3</sup> Center for Brain Science, RIKEN, Saitama, Japan

9 \* Correspondence: [alessio.delogu@kcl.ac.uk](mailto:alessio.delogu@kcl.ac.uk)

10

## 11 **Abstract**

12 The proportion and distribution of local inhibitory neurons (interneurons) in the thalamus  
13 varies widely across mammals. This is reflected in the structure of thalamic local circuits,  
14 which is more complex in primates compared to smaller-brained mammals like rodents.

15 An increase in the number of thalamic interneurons could arise from addition of novel  
16 interneuron types or from elaboration of a plesiomorphic ontogenetic program, common to  
17 all mammals. The former has been proposed for the human brain, with migration of  
18 interneurons from the ventral telencephalon into higher order thalamus as one of its unique  
19 features (Letinic and Rakic, 2001).

20 Here, we identify a larger than expected complexity and distribution of interneurons across  
21 the mouse thalamus. All thalamic interneurons can be traced back to two developmental  
22 programs: one specified in the midbrain and the other in the forebrain. Interneurons migrate  
23 to functionally distinct thalamic nuclei, where the midbrain-derived cells populate the sensory  
24 thalamus, and forebrain-generated interneurons only the higher order regions. The latter  
25 interneuron type may be homologous to the one previously considered to be human-specific,  
26 while we also observe that markers for the midbrain-born class are abundantly expressed in  
27 the primate thalamus. These data therefore point to a shared ontogenetic organization of  
28 thalamic interneurons across mammals.

29

## 30 **Introduction**

31 The thalamus is a forebrain structure that develops from the diencephalic prosomere 2 (p2)  
32 (Puelles and Rubenstein, 2003; Shi et al., 2017; Wong et al., 2018) and is primarily  
33 composed of cortically projecting excitatory thalamocortical (TC) neurons, divided into more  
34 than 30 individual nuclei in mammals (Jones, 2007; Clascá, Rubio-Garrido and Jabaudon,  
35 2012; Hunnicutt et al., 2014). The function of the thalamus has been historically described  
36 as relay of sensory information to the cortex (Hubel and Wiesel, 1962; van der Loos and  
37 Woolsey, 1973; Shatz, 1996; Sherman and Guillery, 2002; Cheong et al., 2013; Piscopo et

1 al., 2013; Zeater et al., 2015). Taking into account the diversity of input and output features  
2 of thalamocortical circuits (Herkenham, 1980; Guillery, 1995; Rubio-Garrido et al., 2009;  
3 Clascá et al., 2012; Sherman, 2016), more recent work has shown that the thalamus is also  
4 critically involved in cognitive processes allowing for behavioural flexibility (Saalman and  
5 Kastner, 2011; Groh et al., 2014; Ling, Pratte and Tong, 2015; Sherman, 2016; Bolkan et al.,  
6 2017; Guo et al., 2017; Schmitt et al., 2017; Rikhye, Gilra and Halassa, 2018; Rikhye,  
7 Wimmer and Halassa, 2018).

8 In contrast to cortical networks, excitatory neurons in the thalamus do not connect with each  
9 other (Jones, 2007; Bickford et al., 2008; Hirsch et al., 2015; Rikhye et al., 2018b). Instead,  
10 local connections and computations within thalamocortical circuits are dominated by the  
11 resident inhibitory, GABA-releasing neurons (interneurons) (Pasik, Pasik and Hamori, 1976;  
12 Montero, 1987; Sherman, 2004; Hirsch et al., 2015).

13 Interneuron numbers and distribution vary widely across species, suggesting that they are  
14 critically involved in the evolution of thalamocortical structure and function (Arcelli et al.,  
15 1997; Letinic and Rakic, 2001; Rikhye et al., 2018b). In particular, comparative studies  
16 across all amniotes (reptiles, birds and mammals) have described a correlation between the  
17 proportion of interneurons and the size and connectivity of the excitatory thalamus (Arcelli et  
18 al., 1997; Butler, 2008).

19 For example, in the reptilian thalamus, which is mostly devoid of descending projections  
20 from the cortex, interneurons have only been identified in the retinorecipient regions (Rio et  
21 al., 1992; Pritz and Stritzel, 1994; Kenigfest et al., 1995, 1998; Butler, 2008). In birds  
22 however, where reciprocal connections between the thalamus and the cortex are more  
23 abundant, thalamic interneurons are distributed more widely (Granda and Crossland, 1989;  
24 Veenman and Reiner, 1994; Butler, 2008).

25 Similarly among mammals, interneurons are largely restricted to the visual thalamus in  
26 smaller-brained marsupials, bats and mice, where they represent only 6% of the total  
27 neuronal population (Butler, 2008; Evangelio, García-Amado and Clascá, 2018; Seabrook et  
28 al., 2013b). In primates, on the other hand, where higher order (HO) nuclei driven by cortical  
29 inputs are expanded relative to sensory relay (first order, FO) regions (Armstrong, 1979;  
30 Stephan, Frahm and Baron, 1981; Butler, 2008; Baldwin, Balaram and Kaas, 2017; Halley  
31 and Krubitzer, 2019), interneurons are present across the entire thalamus and their  
32 proportion increases to around 30% (Braak and Bachmann, 1985; Arcelli et al., 1997).

33 How could these differences arise as part of species-specific ontogenesis of thalamic  
34 interneurons? We have previously shown that in the mouse, interneurons in the FO visual  
35 thalamus, the dorsal lateral geniculate nucleus (dLGN), originate in the midbrain from an  
36 *En1<sup>+</sup>Gata2<sup>+</sup>Otx2<sup>+</sup>Sox14<sup>+</sup>* lineage (Jager et al., 2016). On the other hand, earlier work in

1 humans has suggested the *DLX1/2*-expressing ganglionic eminences (GE) in the  
2 telencephalon as the source of interneurons for the HO thalamic nuclei - the mediodorsal  
3 nucleus and the pulvinar (Rakić and Sidman, 1969; Letinić and Kostović, 1997; Letinic and  
4 Rakic, 2001). At the same time, the latter studies were not able to detect any such migration  
5 from the GE in the mouse and macaque brain (Letinic and Rakic, 2001). Altogether these  
6 findings therefore suggest that innovation in developmental origin underlies the evolution of  
7 thalamic interneurons, concomitantly with an expanded cortical input to the thalamus.  
8 However, because each study considered different thalamic nuclei, and due to technical  
9 limitations, the possibility of evolutionary conservation of thalamic interneuron classes  
10 remains.

11  
12 Here we hypothesised that in fact all mammals share a conserved developmental  
13 organization of thalamic interneurons, which becomes increasingly more elaborated in  
14 larger-brained species. This prediction is supported by findings from the cortex  
15 demonstrating that its interneuron classes, generated in the subpallium and defined through  
16 expression of regulatory programs (i.e. transcription factors), are common to the amniote  
17 lineages (Métin et al., 2007; Tasic et al., 2018; Tosches et al., 2018; Arendt et al., 2019).  
18 Moreover, a conserved subpallial origin was demonstrated for cortical interneurons in the  
19 cyclostome hagfish, and therefore appears to be an ancestral feature of the vertebrate brain  
20 (Sugahara et al., 2016, 2017).

21 Using mouse genetics together with *in situ* methods and spatial modeling, we investigated  
22 the distribution, transcription factor (TF) expression and ontogeny of thalamic GABAergic  
23 interneurons comprehensively across the mouse thalamocortical nuclei. These experiments  
24 identify a wider distribution of GABAergic interneurons than previously reported (Arcelli et  
25 al., 1997; Seabrook et al., 2013b; Evangelio et al., 2018), encompassing both FO sensory  
26 relay and HO thalamic nuclei. We then show that while the largest proportion of thalamic  
27 interneurons in the mouse is generated in the *En1*<sup>+</sup>*Sox14*<sup>+</sup> embryonic midbrain, there is an  
28 additional class that derives from the *Dlx5*<sup>+</sup> inhibitory progenitor domains in the forebrain,  
29 potentially homologous to the one identified in humans. Intriguingly, we also find that  
30 interneurons are organized in a spatial pattern according to their ontogeny, such that  
31 midbrain-born interneurons are largely found in the sensory relay nuclei, while the forebrain-  
32 generated interneurons reside exclusively in the HO thalamus. Finally, we examined the  
33 evidence for midbrain-generated interneurons in the primate (marmoset) thalamus, and  
34 observed an abundant expression of corresponding marker genes.

35  
36

## 1 Results

2

### 3 **GABAergic cells are widely distributed across the mouse thalamus, with *Sox14*** 4 **expression distinguishing between two spatially clustered classes**

5 To investigate spatial and molecular diversity of interneurons comprehensively across all  
6 thalamic (thalamocortical, TC) regions in the mouse, we searched for markers by leveraging  
7 publicly available single-cell RNA sequencing data resources, and used mouse genetics  
8 together with *in situ* hybridization to anatomically map their expression.

9 In the mouse thalamus, GABAergic interneurons are most abundant in the dLGN (Arcelli et  
10 al., 1997; Evangelio et al., 2018). Both the Allen Brain Atlas (© 2015 Allen Institute for Brain  
11 Science. Allen Cell Types Database. Available from: [celltypes.brain-map.org](http://celltypes.brain-map.org)) and DropViz  
12 resources (Available from: [dropviz.org](http://dropviz.org); Saunders et al., 2018) identify a transcriptional  
13 cluster corresponding to mouse dLGN interneurons, and from this *Sox14* as one of  
14 transcription factor genes expressed selectively in the interneurons within the nucleus,  
15 confirming our previous findings (Jager et al., 2016). *Sox14* is expressed upon cell-cycle exit  
16 within inhibitory lineages in the diencephalon, midbrain, hindbrain and spinal cord, but not in  
17 the telencephalon (Delogu et al., 2012; Achim et al., 2013; Prekop et al., 2018; Guo and Li,  
18 2019). We focused on a developmentally expressed transcriptional regulator with the  
19 assumption that cells of the same class/family would implement the same differentiation  
20 program (Deneris and Hobert, 2014; Tosches et al., 2018; Arendt et al., 2019).

21 We then mapped the spatial distribution of *Sox14*<sup>+</sup> cells within all TC regions using the  
22 *Sox14*<sup>GFP/+</sup> line (Crone et al., 2008), and compared it to that of the entire GABAergic  
23 population, labelled with *in situ* hybridization for *Gad1* (Fig. 1A-C). Experiments were done at  
24 postnatal day (P)14, by which time point mouse TC nuclei are considered to display adult-  
25 like circuit composition (Bickford et al., 2010; Golding et al., 2014; Seabrook et al., 2013a,b,  
26 2017; Thompson et al., 2016).

27 In addition to the dLGN, *Sox14*<sup>+</sup> cells distributed across the LP, VP, PO and in very small  
28 numbers in the MG complex (Fig. 1A,C,D). In these nuclei all *Sox14*<sup>+</sup> cells had a GABAergic  
29 profile and co-expressed *Gad1* (100%, n=3 brains). In the dLGN, VP and MG (i.e. FO  
30 sensory relay nuclei) they also represented virtually all GABAergic cells (≥98%, pie charts in  
31 Fig. 1D).

32 Unexpectedly however, 22.1±4.0% of the total GABAergic population in TC regions did not  
33 express *Sox14* (Fig. 1B,C; 3Bii), and these cells appeared spatially largely non-overlapping  
34 with the *Sox14*<sup>+</sup> class (Fig. 1C,D). In particular, we observed the largest proportion of *Sox14*<sup>-</sup>  
35 *Gad1*<sup>+</sup> cells in the MD (29.6±4.5%), LD (19.4±3.1%) and LP (13.2±1.2%), and in smaller  
36 numbers in the CL, PO, VAL and VM (Fig. 1B,C,D).

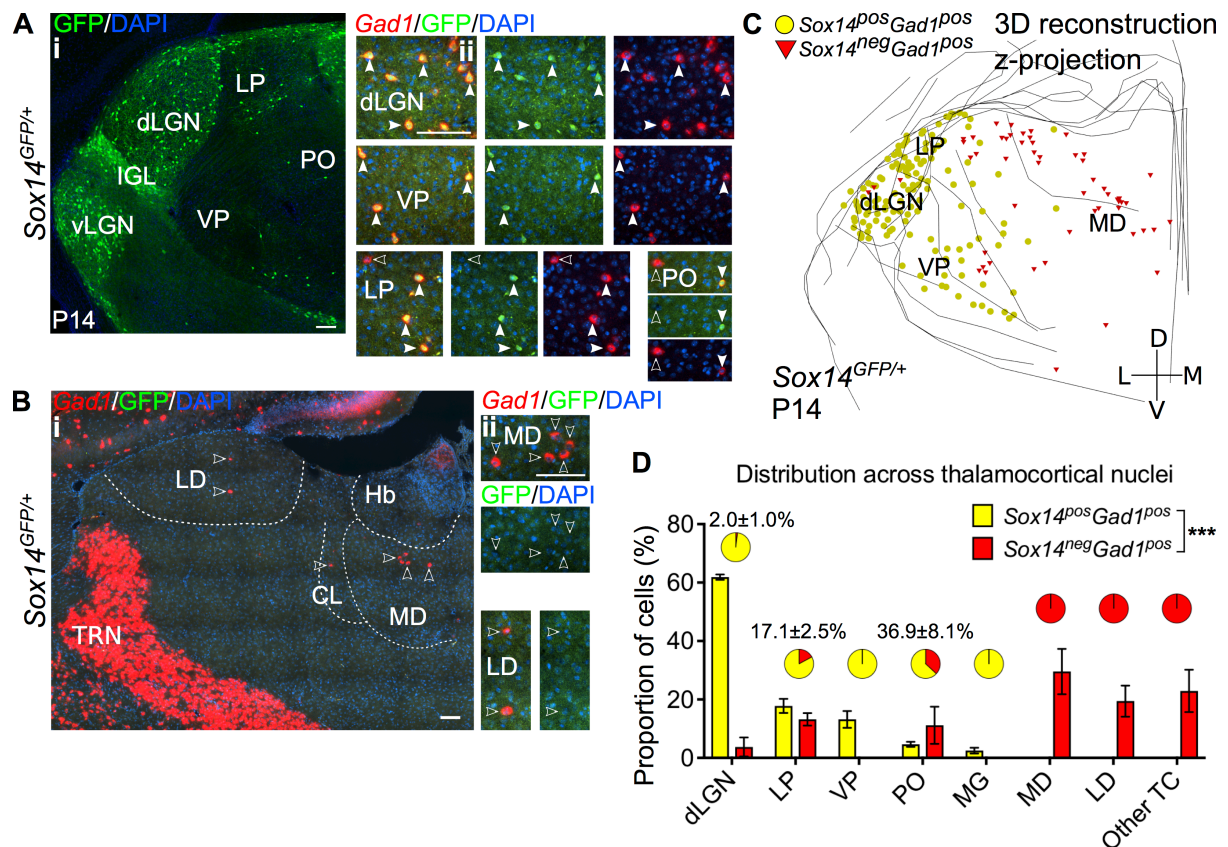

1  
2 **Figure 1.** Diversity and distribution of GABAergic cells in the mouse thalamocortical nuclei.  
3 **A.** (i) Representative coronal section of P14 *Sox14<sup>GFP/+</sup>* thalamus with *Sox14<sup>+</sup>* cells in the  
4 dLGN, VP, LP and PO. (ii) *Sox14<sup>+</sup>* cells in TC regions co-express *Gad1*, but not all *Gad1<sup>+</sup>*  
5 cells co-express *Sox14* in the LP and PO. Filled arrows mark *Sox14<sup>+</sup>Gad1<sup>+</sup>* and empty  
6 arrows *Sox14<sup>-</sup>Gad1<sup>+</sup>* cells. Scale bars, 100  $\mu$ m. **B.** (i) Representative rostral coronal section  
7 of P14 *Sox14<sup>GFP/+</sup>* thalamus with *Gad1<sup>+</sup>* cells in the MD, CL and LD, and containing no  
8 *Sox14<sup>+</sup>* cells. (ii) *Gad1<sup>+</sup>* cells in these nuclei do not co-express *Sox14*. Scale bars, 100  $\mu$ m.  
9 **C.** 3D reconstruction of a representative P14 *Sox14<sup>GFP/+</sup>* thalamus from tracing every tenth  
10 20 $\mu$ m-thick coronal section, displayed as a z-projection and showing distribution of  
11 *Sox14<sup>+</sup>Gad1<sup>+</sup>* (yellow) and *Sox14<sup>-</sup>Gad1<sup>+</sup>* cells (red). One dot represents one neuron. **D.**  
12 Distribution of *Sox14<sup>+</sup>Gad1<sup>+</sup>* and *Sox14<sup>-</sup>Gad1<sup>+</sup>* cells across TC nuclei in the *Sox14<sup>GFP/+</sup>*  
13 brains at P14, plotted as proportion of all the cells within each interneuron group (mean $\pm$ SE;  
14 n= 3 brains). *Sox14<sup>+</sup>Gad1<sup>+</sup>* and *Sox14<sup>-</sup>Gad1<sup>+</sup>* populations have distinct distributions (p $\sim$ 0,  
15 Chi-squared test). Pie charts show the proportion (mean $\pm$ SE) of the two interneuron classes  
16 within each nucleus.

17  
18 To quantitatively demonstrate spatial clustering of these two putative thalamic interneuron  
19 classes (*Sox14<sup>+</sup>Gad1<sup>+</sup>* and *Sox14<sup>-</sup>Gad1<sup>+</sup>*), we calculated the nearest neighbour distances  
20 (NND) from 3D reconstructions of their respective distributions in the *Sox14<sup>GFP/+</sup>* thalamus  
21 (Fig. 1C; 2A). Indeed, the cumulative distribution of NNDs was significantly shifted to smaller  
22 distances within each of the classes than between them (p<1.4 $\times$ 10<sup>-30</sup>, 2-sample  
23 Kolmogorov-Smirnov test, n=3 brains; Fig. 2A).

24 To characterise spatial organization of thalamic GABAergic interneurons in an unbiased  
25 way, we then applied machine learning (k-Means clustering) to these same 3D

1 reconstructions of the *Sox14*<sup>GFP/+</sup> thalami (Fig. 1C; 2B,C). The data best fit two spatial  
 2 clusters, as assessed from the silhouette score (Fig. 2Bii,C; see also Materials and  
 3 Methods). Consistent with the NND analysis, one cluster corresponded to the *Sox14*<sup>+</sup> cells  
 4 (contains 94.9±1.4% of all *Sox14*<sup>+</sup> cells), and the other to the *Sox14*<sup>-</sup> interneurons (contains  
 5 81.0±0.3% of all *Sox14*<sup>-</sup> cells; Fig. 2B,D). The two thalamic molecular GABAergic groups  
 6 therefore occupy their own respective spatial clusters, with the *Sox14*<sup>-</sup> cells located more  
 7 rostrally and medially compared to the *Sox14*<sup>+</sup> interneurons.  
 8

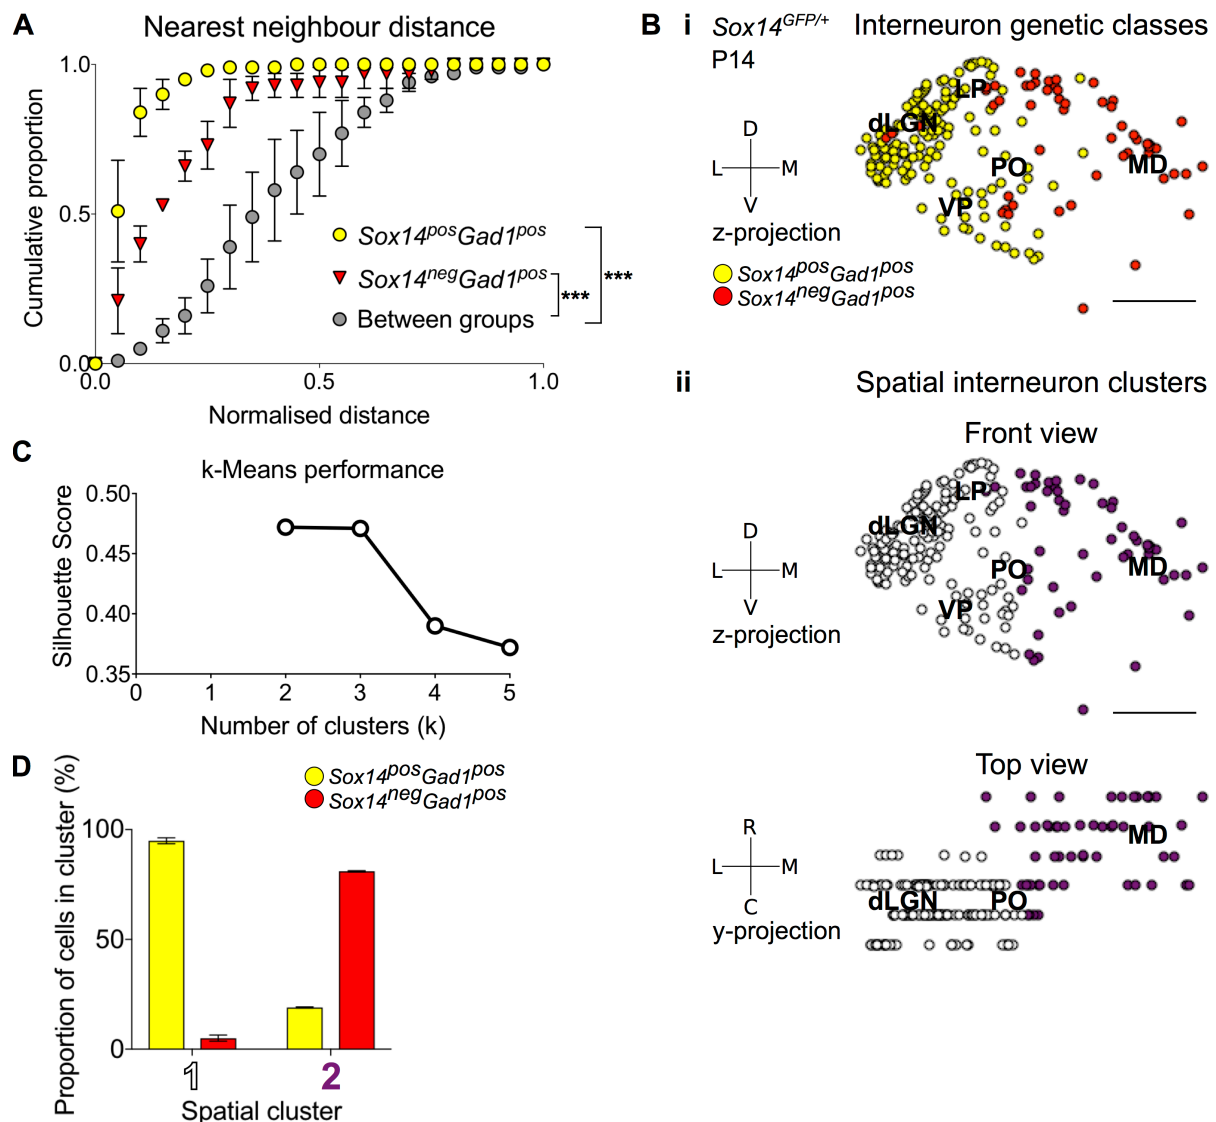

9

10 **Figure 2.** Spatial organization of thalamic GABAergic cells. **A.** Normalised nearest  
 11 neighbour distance (NND) for *Sox14*<sup>+</sup>*Gad1*<sup>+</sup> and *Sox14*<sup>-</sup>*Gad1*<sup>+</sup> populations and between the  
 12 two groups from P14 *Sox14*<sup>GFP/+</sup> data (Fig. 1), plotted as cumulative proportion of all cells  
 13 within a given set. The NND distribution is significantly shifted to larger distances between  
 14 groups than within each of the groups ( $p < 1.4 \times 10^{-30}$ , 2-sample Kolmogorov-Smirnov test,  $n=3$   
 15 brains). **B.** Representative z-projections of IN distribution amongst TC nuclei, from P14  
 16 *Sox14*<sup>GFP/+</sup> data (Fig. 1). One dot represents one neuron and they are colour-coded by (i)  
 17 their genetic identity or (ii) spatial cluster. For the spatial clusters a y-projection is also

1 shown. Scale bars, 500 $\mu$ m. **C.** Performance of unsupervised k-Means algorithm in  
2 identifying thalamic interneuron spatial clusters from the P14 *Sox14*<sup>GFP/+</sup> data (n=3 brains,  
3 see also Fig. 1) as measured by the silhouette score, which varies with number of clusters  
4 (k). We choose k=2 as this point has the highest score. **D.** Proportion of *Sox14*<sup>+</sup> and *Sox14*<sup>-</sup>  
5 GABAergic cells in each spatial cluster, averaged over three brains (mean $\pm$ SE).  
6

7 To independently confirm our findings and control for potential effects of looking at a juvenile  
8 age (P14), we also mapped anatomical distribution of all *Gad1*<sup>+</sup> and *Chrna6*<sup>+</sup> cells across the  
9 adult mouse TC nuclei at P56, using the Allen Mouse Brain Atlas (© 2004 Allen Institute for  
10 Brain Science. Allen Mouse Brain Atlas. Available from: [mouse.brain-map.org](http://mouse.brain-map.org); Lein et al.,  
11 2006) *in situ* hybridization data (Supp. Fig. 1). *Chrna6* has been identified as another marker  
12 specific for interneurons, at least in the dLGN (Golding et al., 2014; DropViz; Allen Cell  
13 Types Database). The resulting 3D reconstructions, k-Means spatial clustering (Supp. Fig.  
14 1A) and distribution plot (Supp. Fig. 1B) were consistent with our observations from the P14  
15 *Sox14*<sup>GFP/+</sup> thalamus.  
16

17 Mouse thalamus therefore exhibits wider interneuron distribution and diversity than has been  
18 previously reported, with at least two molecularly and spatially distinct classes. The largest  
19 interneuron class, which is distributed across FO and HO sensory nuclei including the dLGN,  
20 can be defined as *Sox14*<sup>+</sup>. Conversely, the smaller *Sox14*<sup>-</sup> GABAergic population is found  
21 exclusively in HO regions that associate with more cognitive functions, such as the MD  
22 (Rikhye et al., 2018a; Halassa and Kastner, 2017).  
23

#### 24 **All *Sox14*-expressing thalamic interneurons are born in the midbrain**

25 We have previously shown that in the *Sox14*<sup>GFP/GFP</sup> (*Sox14* knockout, KO) there is a >90%  
26 reduction in the number of interneurons in the dLGN (Jager et al., 2016). Given the role of  
27 *Sox14* in specifying subcortical inhibitory classes (Delogu et al., 2012; Achim et al., 2013;  
28 Prekop et al., 2018; Guo and Li, 2019), this analysis was extended here to encompass all  
29 TC regions. We find a comparable reduction in the number of *Sox14*<sup>+</sup> interneurons overall  
30 across the dLGN, LP, VP, PO and MG in the *Sox14* KO (90.5 $\pm$ 1.5%,  $p=2.7\times 10^{-4}$ , two-sample  
31 two-tailed t-test, n=3 brains/genotype; Fig. 3A,B). Conversely, there was no significant  
32 change in the number of *Sox14*<sup>-</sup>*Gad1*<sup>+</sup> cells ( $p=0.4$ , two-sample two-tailed t-test; Fig. 3A,B)  
33 and in their distribution across TC regions (Fig. 3A,C;  $p>0.05$ , Chi-squared test, n=3  
34 brains/genotype). These results therefore indicate that the two TC interneuron populations  
35 may already be segregated during development and represent two non-overlapping  
36 GABAergic lineages.  
37

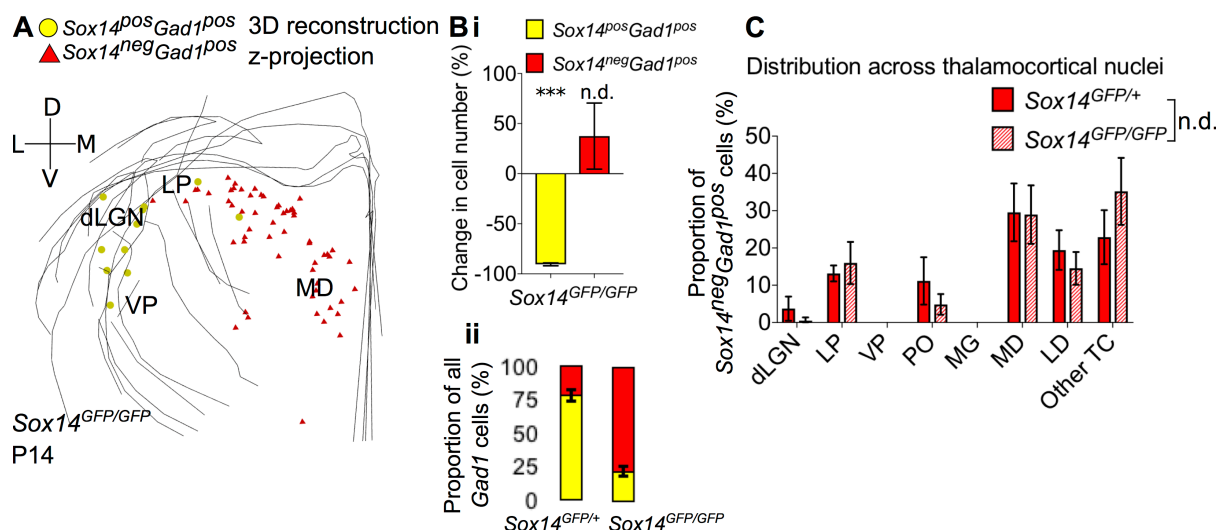

1  
2 **Figure 3. A.** 3D reconstruction of a representative P14  $\text{Sox14}^{\text{GFP/GFP}}$  thalamus from tracing  
3 every tenth 20 $\mu\text{m}$ -thick coronal section, displayed as a z-projection and showing distribution  
4 of  $\text{Sox14}^{\text{+}}\text{Gad1}^{\text{+}}$  (yellow) and  $\text{Sox14}^{\text{-}}\text{Gad1}^{\text{+}}$  cells (red). **B.** (i) Relative change in the number  
5 of  $\text{Sox14}^{\text{+}}\text{Gad1}^{\text{+}}$  and  $\text{Sox14}^{\text{-}}\text{Gad1}^{\text{+}}$  cells across TC regions in P14  $\text{Sox14}^{\text{GFP/GFP}}$  relative to  
6 P14  $\text{Sox14}^{\text{GFP/+}}$  data (mean $\pm$ SE, n=3 brains/genotype). There is a significant reduction in the  
7  $\text{Sox14}^{\text{+}}\text{Gad1}^{\text{+}}$  population ( $p=2.7\times 10^{-4}$ , two-sample two-tailed t-test), but no statistically  
8 significant difference in the size of the  $\text{Sox14}^{\text{-}}\text{Gad1}^{\text{+}}$  group ( $p=0.4$ , two-sample two-tailed t-  
9 test). (ii) Proportion of  $\text{Sox14}^{\text{+}}\text{Gad1}^{\text{+}}$  cells within the total GABAergic population is decreased  
10 in the  $\text{Sox14}^{\text{GFP/GFP}}$  (mean $\pm$ SE, n=3 brains/genotype). **C.** Distribution of  $\text{Sox14}^{\text{-}}\text{Gad1}^{\text{+}}$  cells  
11 across TC nuclei in the  $\text{Sox14}^{\text{GFP/+}}$  and  $\text{Sox14}^{\text{GFP/GFP}}$  brains at P14 (mean $\pm$ SE; n= 3  
12 brains/genotype).  $\text{Sox14}^{\text{-}}\text{Gad1}^{\text{+}}$  distribution is unaltered in the  $\text{Sox14}$  KO ( $p>0.05$ , Chi-  
13 squared test).  
14

15 dLGN interneurons in the mouse derive from the midbrain (Jager et al., 2016). To explore  
16 how the molecular and spatial organization of thalamic interneurons is generated during  
17 development more conclusively, we fate-mapped midbrain lineages and checked for their  
18 presence, distribution and inhibitory profile across the thalamus. We crossed *En1-Cre*  
19 (Kimmel et al., 2000) with a *R26/Sl-GFP* (Sousa et al., 2009) reporter line (Fig. 4A), as the  
20 *En1* TF gene is expressed in the midbrain and rostral hindbrain progenitors, but not in the  
21 forebrain (Sgaier et al., 2007). The analysis was done at P21-30 and, confirming our  
22 previous findings, there were  $\text{GFP}^{\text{+}}$  cells (*En1*<sup>+</sup> lineage) distributed across the dLGN and co-  
23 expressing GABA (Fig. 4B). However, like the  $\text{Sox14}^{\text{+}}\text{Gad1}^{\text{+}}$  neurons, *En1*<sup>+</sup> cells were  
24 observed beyond the dLGN - in the LP, VP, PO and MG, where they were also positive for  
25 GABA (Fig. 4B,C). Plotting their distribution confirmed that it is equivalent to  $\text{Sox14}^{\text{+}}$   
26 interneurons ( $p>0.05$ , Chi-squared test; Fig. 4C,D). Occasional  $\text{GFP}^{\text{+}}$  cells with glia-like  
27 morphology were also observed in the thalamus. These cells were  $\text{GABA}^{\text{-}}$  and were not  
28 included in any of the analyses.



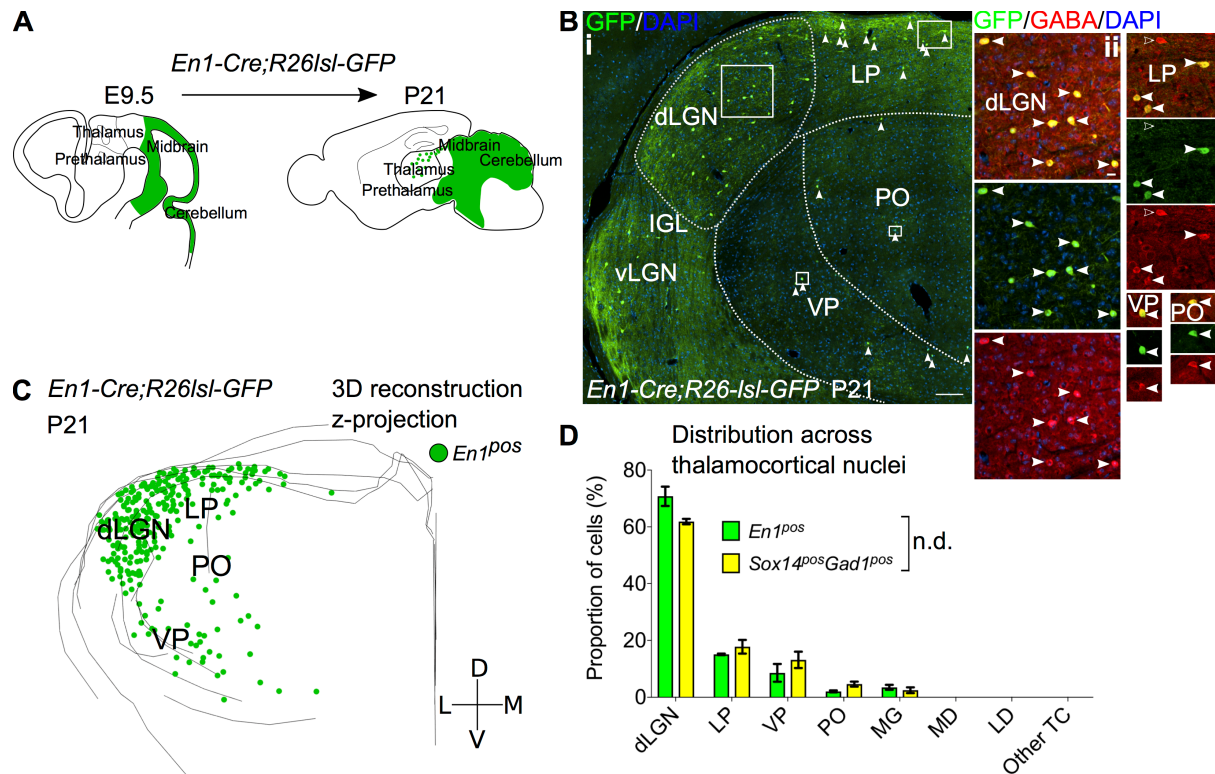

1  
2 **Figure 4. Sox14<sup>+</sup> interneurons in TC regions derive from the midbrain.** **A.** Schematic of the  
3 fate mapping experiment: crossing *En1-Cre* with *R26Isl-GFP* reporter line permanently  
4 labels all midbrain born cells with GFP expression. **B.** (i) Representative coronal section of  
5 P21 *En1-Cre;R26Isl-GFP* thalamus with *En1*<sup>+</sup> cells observed in the dLGN, LP, VP and PO  
6 (considering TC regions only). For clarity some of the *En1*<sup>+</sup> cells are indicated with white  
7 arrows. Scale bar, 100µm. (ii) *En1*<sup>+</sup> cells in these regions co-express GABA (filled white  
8 arrows). Empty arrows mark GABA single-positive cells. Scale bar, 10µm. **C.** 3D  
9 reconstruction of a representative P21 *En1-Cre;R26Isl-GFP* thalamus from tracing every  
10 sixth 60µm-thick coronal section, displayed as a z-projection and showing distribution of  
11 *En1*<sup>+</sup> cells. **D.** Distribution of *Sox14*<sup>+</sup>*Gad1*<sup>+</sup> and *En1*<sup>+</sup> cells across TC nuclei in *Sox14*<sup>GFP/+</sup> and  
12 *En1-Cre;R26Isl-GFP* brains, respectively, plotted as proportion of all the cells within each  
13 group (mean±SE; n= 3 brains/genotype). The two populations are not differently distributed  
14 (p>0.05, Chi-squared test).  
15

16 We therefore conclude that the *Sox14*<sup>+</sup> thalamic interneurons derive from the midbrain, and  
17 simultaneously that the *Sox14*<sup>-</sup> GABAergic cells do not; the two classes thus represent  
18 distinct inhibitory lineages in TC regions, further supporting their definition as two distinct  
19 thalamic interneuron classes.  
20

## 21 **Midbrain-derived interneurons migrate into the sensory thalamus in the first postnatal** 22 **week in two streams**

23 *En1-Cre;R26Isl-GFP* line was then used to investigate the timeline and spatial trajectories of  
24 the *Sox14*<sup>+</sup> interneuron precursors migrating from the midbrain into the first and higher order  
25 sensory TC regions (Fig. 5A). Previously, dLGN interneurons were found to populate this  
26 nucleus in the first postnatal week (Golding et al., 2014; Jager et al., 2016). We therefore

1 looked at the numbers and migratory morphology of GFP<sup>+</sup> (i.e. *En1*<sup>+</sup>) cells in the thalamus at  
2 E16.5, E17.5, P0.5, P1.5 and P2.5. We focused on the dLGN, LP and VP, but left out the  
3 PO and MG, due to low overall numbers of interneurons in these two regions in the  
4 juvenile/adult mouse thalamus (Fig. 1, Supp. Fig. 1).

5 At E16.5 no GFP<sup>+</sup> cells were present in the thalamus. From E17.5 to P2.5 their numbers  
6 progressively increased in all of the regions analysed (Fig. 5A,B). The number of GFP<sup>+</sup> cells  
7 in the dLGN at P2.5 matched previous independent reports (Golding et al., 2014), validating  
8 our counting method. Midbrain-derived interneurons therefore populate the different TC  
9 regions following a similar timeline. Interestingly, they appear in two ventrally located nuclei  
10 (i.e. dLGN and VP) simultaneously (Fig. 5A,B), implying they use distinct routes to reach  
11 them.

12 To infer their direction of migration, we determined the leading process orientation of  
13 migrating GFP<sup>+</sup> cells along all three dimensions (ventro-dorsal, latero-medial, caudo-rostral;  
14 Fig. 5C; Jager et al., 2016; Paredes et al., 2016). This was plotted at a population level as  
15 frequency distribution using heat maps, for each nucleus individually, for E17.5 and P0.5  
16 (Fig. 5D; Supp. Fig. 2B), as the relative increase in GFP<sup>+</sup> cell numbers was the greatest  
17 between these two timepoints (Fig. 5B). Moreover, there was a progressive decrease across  
18 developmental stages in the proportion of GFP<sup>+</sup> cells for which migratory morphology could  
19 be identified (Supp. Fig. 2A).

20 Heat maps indicate that at a population level (integrated across dimensions), GFP<sup>+</sup> cells  
21 migrate into the dLGN, LP and VP in a caudo-rostral and dorso-ventral direction (Fig. 5D),  
22 consistent with the position of the thalamus in the brain relative to their midbrain origin.  
23 However, GFP<sup>+</sup> precursors in the dLGN and LP have a dominant medio-lateral orientation,  
24 while those in the VP an opposite, latero-medial orientation, as can also be seen from polar  
25 histograms (Supp. Fig. 2C). This suggests that midbrain-derived interneuron precursors  
26 enter TC regions simultaneously in two distinct streams, one migrating rostro-ventro-laterally  
27 to the dLGN and LP, and the other rostro-ventro-medially to the VP, indicating a split  
28 between visual (dLGN, LP) and somatosensory (VP) TC nuclei.

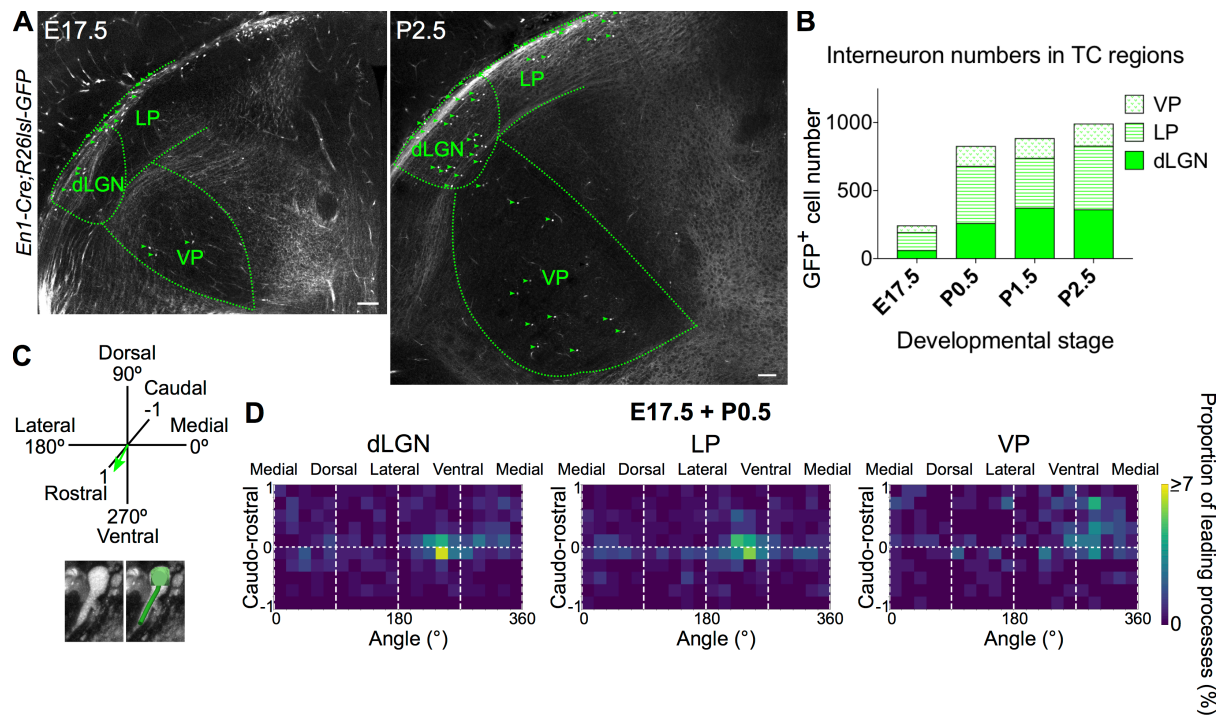

1  
 2  
 3  
 4  
 5  
 6  
 7  
 8  
 9  
 10

**Figure 5.** Midbrain-derived interneuron precursors progressively populate the thalamus from E17.5 onwards. **A.** Representative coronal sections of *En1-Cre;R26Isl-GFP* thalamus at E17.5 and P2.5. Green arrows mark some of the GFP<sup>+</sup> cells. Scale bars, 100µm. **B.** Number of GFP<sup>+</sup> cells counted in the dLGN, LP and VP from E17.5 to P2.5 (mean, n=3 brains). **C.** Leading process orientation of GFP<sup>+</sup> cells was determined along the caudo-rostral, ventro-dorsal and latero-medial dimensions. **D.** Frequency distribution of leading process orientation for GFP<sup>+</sup> cells in the dLGN, LP and VP at E17.5 and P0.5 combined, represented in heat maps (n=3 brains/developmental stage).

### 11 **Sox14-negative thalamic interneurons populating higher order nuclei are born in the** 12 **forebrain**

13 Having excluded the midbrain, we aimed to identify the origin of the *Sox14*<sup>-</sup> interneuron class  
 14 in the mouse HO TC regions. To molecularly define it, we made use of DropViz data  
 15 (Available from: [dropviz.org](http://dropviz.org); Saunders et al., 2018) and observed that within inhibitory  
 16 clusters from the thalamus and surrounding regions, *Sox14* and *Pvalb* show largely non-  
 17 overlapping expression, where *Pvalb* is a marker for at least 5 out of 11 inhibitory clusters  
 18 (*Pvalb* p-value < 9.05e<sup>-30</sup>). It is known that *Pvalb* is expressed by the nearby prethalamic  
 19 structures like the thalamic reticular nucleus (TRN; Clemente-Perez et al., 2017), and by  
 20 telencephalic interneuron types derived from the ganglionic eminences (Marin and  
 21 Rubenstein, 2001; Tremblay, Lee and Rudy, 2016; Tasic et al., 2016).

22 We therefore crossed *Pv-Cre* (Hippenmeyer et al., 2005) with a *R26Isl-nuclearGFP* (Mo et  
 23 al., 2015) reporter line to label *Pvalb*<sup>+</sup> cells, and assessed their distribution and GABAergic  
 24 profile in TC nuclei at P14 (Supp. Fig. 3A). *Pvalb*<sup>+</sup> cells were present in regions populated by  
 25 the *Sox14*<sup>-</sup> interneurons, including the MD, LD, LP and PO, and absent from the nuclei  
 26 populated exclusively by *Sox14*<sup>+</sup> interneurons, such as the dLGN and VP (Supp. Fig. 3Ai).

1 At later ages (P56) *Pvalb* is widely expressed in the thalamus, and is observed in high-  
2 density gradients in several nuclei, including the VP (© 2004 Allen Institute for Brain  
3 Science. Allen Mouse Brain Atlas. Available from: [mouse.brain-map.org](http://mouse.brain-map.org); Lein et al., 2006).  
4 Importantly however, at P14 93.9% of *Pvalb*<sup>+</sup> cells in TC regions co-expressed GABA (n=2  
5 brains, Supp. Fig. 3Aii,B). Therefore, we define the *Sox14*<sup>-</sup> GABAergic cells as *Pvalb*<sup>+</sup>, and  
6 restricted our analyses to P14.

7  
8 Previous reports suggested the *DLX1/2/5*<sup>+</sup> ganglionic eminences (GE) as a source of  
9 thalamic interneurons in humans (Rakić and Sidman, 1969; Letinić and Kostović, 1997;  
10 Letinic and Rakic, 2001). We investigated this possibility directly and fate-mapped the  
11 progeny from forebrain inhibitory progenitor domains in the mouse thalamus, by crossing  
12 *Dlx5-Cre* (Monory et al., 2006) to *R26Isl-GFP* line (Fig. 6A).

13 At P14 all TC *Pvalb*<sup>+</sup> cells are a *Dlx5* lineage (GFP<sup>+</sup>; 100%, n=3 brains; Fig. 6B,Ci) and  
14 majority of them co-expressed GABA (93.6±3.7%; Fig. 6Cii), in line with observations from  
15 the *Pv-Cre;R26Isl-nGFP* line (Supp. Fig. 3Aii,B).

16 We also observed *Pvalb*<sup>-</sup>*Dlx5*<sup>+</sup> cells in the thalamus, the majority of which had a glia-like  
17 morphology and did not express GABA (Supp. Fig. 3C). Occasional *Pvalb*<sup>-</sup>GABA<sup>-</sup>*Dlx5*<sup>+</sup> cells  
18 with neuronal-like morphology were also seen (Supp. Fig. 3C,D), suggesting leaky Cre  
19 activity in some cases. That all *Pvalb*<sup>+</sup>GABA<sup>+</sup> cells in TC nuclei are labelled with GFP argues  
20 against this being an artefact of leaky reporting. *Pvalb*<sup>-</sup>GABA<sup>-</sup>*Dlx5*<sup>+</sup> cells were not considered  
21 in any of the analyses.

22 Finally, we mapped the distribution of *Pvalb*<sup>+</sup>*Dlx5*<sup>+</sup> cells across TC regions (Fig. 6D,E) and  
23 observed that it matches the *Sox14*<sup>-</sup>*Gad1*<sup>+</sup> cells (Fig. 6E; p>0.05, Chi-squared test).  
24 Altogether, we therefore conclude that the *Sox14*<sup>-</sup>*Pvalb*<sup>+</sup> thalamic interneurons originate from  
25 *Dlx5*<sup>+</sup> inhibitory progenitors domains located in the forebrain, emphasizing their distinct  
26 lineage compared to the larger, midbrain-born *Sox14*<sup>+</sup> thalamic interneuron class.

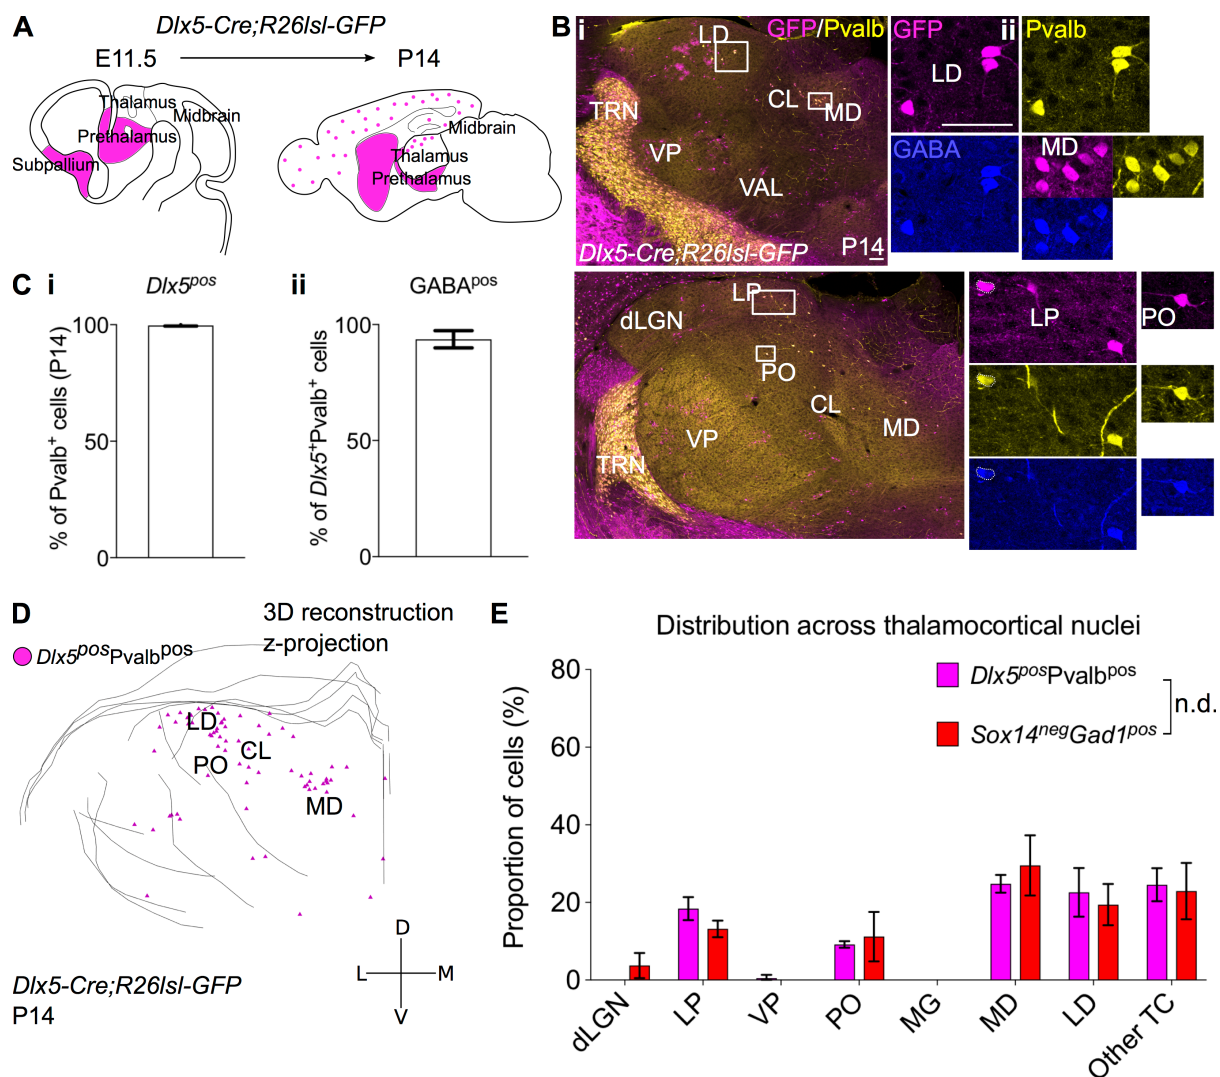

1  
2 **Figure 6.** *Sox14*<sup>+</sup>*Pvalb*<sup>+</sup> interneurons in TC regions derive from the rostral forebrain. **A.**  
3 Schematic of the fate mapping experiment: crossing *Dlx5-Cre* with *R26Isl-GFP* reporter line  
4 permanently labels all ventral telencephalic and prethalamic-born cells with GFP expression.  
5 **B.** (i) Representative coronal sections of P14 *Dlx5-Cre;R26Isl-GFP* thalamus with  
6 *Dlx5*<sup>+</sup>*Pvalb*<sup>+</sup> cells present in the MD, LD, CL, VAL, VM, LP and PO (considering TC regions  
7 only). Scale bar, 100µm. (ii) *Dlx5*<sup>+</sup>*Pvalb*<sup>+</sup> cells in TC regions co-express GABA. Scale bar,  
8 100µm. **C.** (i) Proportion of *Pvalb*<sup>+</sup> cells in TC regions that are *Dlx5*<sup>+</sup> at P14 (mean±SE, n=3  
9 brains). (ii) Proportion of *Dlx5*<sup>+</sup>*Pvalb*<sup>+</sup> cells in TC regions co-expressing GABA at P14  
10 (mean±SE, n=3 brains). **D.** 3D reconstruction of a representative P14 *Dlx5-Cre;R26Isl-GFP*  
11 thalamus from tracing every sixth 60µm-thick coronal section, displayed as a z-projection  
12 and showing distribution of *Dlx5*<sup>+</sup>*Pvalb*<sup>+</sup> cells. **E.** Distribution of *Dlx5*<sup>+</sup>*Pvalb*<sup>+</sup> and *Sox14*<sup>-</sup>  
13 *Gad1*<sup>+</sup> cells across TC nuclei in P14 *Dlx5-Cre;R26Isl-GFP* and *Sox14*<sup>GFP/+</sup> brains,  
14 respectively, plotted as proportion of all the cells within each group (mean±SE, n= 3  
15 brains/genotype). The two populations are not differently distributed (p>0.05, Chi-squared  
16 test).

17  
18 The presence of a *Dlx5*<sup>+</sup> inhibitory lineage in the mouse thalamus is therefore consistent with  
19 the proposed ontogeny for human thalamic interneurons (Rakic and Sidman, 1969; Letinic  
20 and Kostovic, 1997; Letinic and Rakic, 2001). Correspondingly, we investigated if the  
21 midbrain-derived interneurons identified in mouse could also be found in the primate

1 thalamus. We used the Marmoset Gene Atlas to examine the expression of *SOX14* and  
2 *OTX2*, known markers for the mouse dLGN interneurons (Golding et al., 2014; Jager et al.,  
3 2016; DropViz), in the early postnatal marmoset thalamus. These were then compared to  
4 the *GAD1* signal (all ISH data available from: <https://gene-atlas.brainminds.riken.jp>;  
5 Shimogori et al., 2018).

6 This shows that both *SOX14*<sup>+</sup> and *OTX2*<sup>+</sup> cells are present across all marmoset  
7 thalamocortical nuclei (Supp. Fig. 4A), with a similar distribution and density to the *GAD1*<sup>+</sup>  
8 neurons (Supp. Fig. 4B), seemingly accounting for the majority of GABAergic cells in the  
9 marmoset dorsal thalamus. On the other hand, forebrain-derived prethalamic inhibitory  
10 structures like the reticular nucleus are negative for the two markers (Supp. Fig. 4A).

11

## 12 **Discussion**

13 Our study reveals a previously unappreciated complexity in the GABAergic interneuron  
14 population distributed across the mouse thalamocortical nuclei.

15 In particular, we describe two broad thalamic interneuron classes, defined by (1) expression  
16 of transcription factors that are part of distinct regulatory programmes of GABAergic  
17 specification (*Sox14*<sup>+</sup> vs *Dlx5*<sup>+</sup>; Eisenstat et al., 1999; Marin and Rubenstein, 2001; Stühmer  
18 et al., 2002; Achim et al., 2013, 2014; Mayer et al., 2018; Mi et al., 2018; Arendt et al.,  
19 2019), and (2) their origin in the midbrain and forebrain, respectively.

20 As expected, interneuron numbers and density were largest in the dLGN. We then show that  
21 one of the markers for the dLGN interneurons, the *Sox14* transcriptional regulator, labels  
22 GABAergic cells found scattered across all first and higher order sensory nuclei (dLGN, LP,  
23 VP, PO and MG; Guillery and Sherman, 2002; Wang, Eisenback and Bickford, 2002;  
24 Pouchelon et al., 2014; Roth et al., 2015; Frangeul et al., 2016). Using fate-mapping, we  
25 demonstrate that in all of these regions *Sox14*<sup>+</sup> interneurons derive from *En1*<sup>+</sup> midbrain and  
26 migrate into the thalamus late embryonically. This is in contrast to the broadly spatially  
27 separated *Sox14*<sup>-</sup> interneurons, representing around 20% of the total thalamic interneuron  
28 population. The *Sox14*<sup>-</sup> class is found exclusively in HO thalamocortical nuclei (e.g. the MD,  
29 LD, LP and PO; Sherman, 2016; Halassa and Kastner, 2017), can be defined as *Pvalb*<sup>+</sup> and  
30 originates from *Dlx5*<sup>+</sup> inhibitory progenitor domains in the forebrain.

31

32 These results reconcile discrepant findings on the origin of thalamic interneurons. For  
33 example, ganglionic eminence-derived *DLX1/2*<sup>+</sup> interneurons were shown to migrate into  
34 human MD and pulvinar (Rakić and Sidman, 1969; Letinić and Kostović, 1997; Letinic and  
35 Rakic, 2001), as opposed to the midbrain origin that we previously identified for the mouse  
36 dLGN interneurons (Jager et al., 2016). Our study suggests these different observations

1 could be the result of spatial segregation of ontogenetic interneuron classes, which may in  
2 fact be conserved across mammals.

3 Supporting this conclusion, gene expression evidence from the marmoset indicates that  
4 midbrain-generated interneurons are also present in the primate thalamus. Similarly, Jones  
5 (2002) and Hayes et al. (2003) previously described late appearance of interneurons in the  
6 ferret and macaque thalamus, progressively from caudal towards rostral nuclei. It can also  
7 be seen from the BrainSpan Atlas of the Developing Human Brain (© 2010 Allen Institute for  
8 Brain Science. BrainSpan Atlas of the Developing Human Brain. Available from:  
9 [www.brainspan.org](http://www.brainspan.org); Miller et al., 2014) that both *GAD1* and *SOX14* expression increase in  
10 the dorsal thalamus in the mid-prenatal period (from postconception week 16), which would  
11 be consistent with a migration of midbrain-born interneurons into these regions.

12  
13 Interestingly, grafting experiments using chick and quail embryos demonstrated a potential  
14 for midbrain cells to populate retino-recipient nuclei in the chick diencephalon (Martinez and  
15 Alvarado-Mallart, 1989). The grafted midbrain cells were observed migrating tangentially at  
16 the surface of the diencephalon and seemingly through the host optic tract before invading  
17 the regions targeted by the retinal projections (Martinez and Alvarado-Mallart, 1989). The  
18 neurotransmitter identity of these migrating cells is unknown, but their midbrain origin and  
19 distribution across the thalamus resemble the mouse *Sox14*<sup>+</sup> interneurons, suggesting that  
20 in birds too, interneurons in the visual thalamus are a midbrain lineage. Relatedly, lineage  
21 tracing in chick, using a retroviral library, indicated that clonally related siblings can populate  
22 both the diencephalon and mesencephalon (Golden and Cepko, 1996).

23 In the future, it would be important to conclusively address how thalamic interneurons  
24 evolved by comparing their diversity and origin comprehensively across amniotes, as was  
25 recently done for cortical interneurons (Tosches et al., 2018; Tasic et al., 2016, 2018).

26  
27 Finally, it is intriguing that in the mouse spatial organization of interneuron classes appears  
28 to correlate with anatomical and functional organization in the thalamus, which sees a split  
29 between sensory relay and higher order processing (Guillery and Sherman, 2002; Sherman,  
30 2016; Halassa and Kastner, 2017). Here we provide genetic definitions and origin for the two  
31 broad thalamic interneuron classes, which can be used to investigate the functional  
32 significance of local inhibition in TC computations underlying both sensory perception and  
33 cognition.

34  
35  
36

## 1 Materials and Methods

2  
3

### Animals

| Species             | Designation                             | Source or reference                                       | Identifiers                                 | Additional information                                                         |
|---------------------|-----------------------------------------|-----------------------------------------------------------|---------------------------------------------|--------------------------------------------------------------------------------|
| <i>Mus musculus</i> | Sox14 <sup>tm1Tmj</sup><br>(Sox14eGFP)  | Crone et al.,<br>2008                                     | MGI ID:<br>3836003                          | Maintained in the<br>C57BL/6J<br>(Charles River<br>Laboratories)<br>background |
| <i>Mus musculus</i> | En1-Cre                                 | Kimmel et al.,<br>2000; The<br>Jackson<br>Laboratory      | Stock No:<br>007916<br>MGI ID:<br>2446434   | C57BL/6J<br>background                                                         |
| <i>Mus musculus</i> | Dlx5/6-Cre                              | Monory et al.,<br>2006; The<br>Jackson<br>Laboratory      | Stock No:<br>008199;<br>MGI ID:3758328      | C57BL/6J<br>background                                                         |
| <i>Mus musculus</i> | B6 PV <sup>cre</sup>                    | Hippenmeyer et<br>al., 2005; The<br>Jackson<br>Laboratory | Stock<br>No: 017320;<br>MGI ID:3590684      | C57BL/6J<br>background                                                         |
| <i>Mus musculus</i> | RCE:loxP                                | Sousa et al.,<br>2009; The<br>Jackson<br>Laboratory       | MMRRC Stock<br>No: 32037-JAX<br>MGI:4412373 | C57BL/6J<br>background                                                         |
| <i>Mus musculus</i> | Gt(ROSA)26Sortm5(CAG-<br>Sun1/sfGFP)Nat | Mo et al., 2015;<br>The Jackson<br>Laboratory             | Stock<br>No: 021039;<br>MGI ID:<br>5443817  | C57BL/6J<br>background                                                         |

4 Table 1: Mouse strains used in the study.

5

6 The mice were housed in the animal facilities at King's College London under standard  
7 conditions on a 12h:12h dark/light cycle, with unrestricted access to water and food. Housing  
8 and experimental procedures were approved by the King's College London Ethical  
9 Committee and conformed to the regulations of the UK Home Office personal and project  
10 licences under the UK Animals (Scientific Procedures) 1986 Act. Both female and male mice  
11 were used in a randomised way across experiments. The morning when the vaginal plug  
12 was observed was designated as embryonic day (E) 0.5 and the day of birth as postnatal  
13 day (P) 0.5.

14

### 15 Immunohistochemistry and *in situ* hybridization

16 Mice were transcardially perfused with 4% PFA and the brains dissected and postfixed in  
17 PFA at 4°C overnight, then washed in PBS for at least 24 hours at 4°C. For *in situ*  
18 hybridization (ISH), brains were stored in PFA for 5 days, to minimise RNA degradation, and  
19 all the subsequent solutions were treated with diethyl pyrocarbonate (DEPC; AppliChem).  
20 The brains were cryoprotected in a sucrose gradient (10–20– 30%), frozen on dry ice and  
21 cryosectioned as 20µm coronal sections collected on Superfrost Ultra Plus slides (Thermo



1 Scientific) for ISH, or as 60µm free-floating coronal sections for IHC.

## 2 *Immunohistochemistry*

| Antibody                    | Dilution | Incubation time | Source               |
|-----------------------------|----------|-----------------|----------------------|
| Rabbit anti-GABA            | 1:2000   | 2X ON, 4°C      | Sigma, A2052         |
| Chicken anti-Gfp            | 1:5000   | 2X ON, 4°C      | Abcam, Ab13970       |
| Mouse anti-Parvalbumin      | 1:2000   | 1X ON, 4°C      | Sigma-Aldrich, P3088 |
| Goat anti-chicken Alexa-488 | 1:500    | 2h, RT          | Invitrogen, A11039   |
| Goat anti-rabbit Alexa-568  | 1:500    | 2h, RT          | Invitrogen, A11036   |
| Goat anti-rabbit Alexa-647  | 1:500    | 2h, RT          | Invitrogen, A21245   |
| Goat anti-mouse Alexa-568   | 1:500    | 2h, RT          | Invitrogen, A11004   |
| Goat anti-mouse Alexa-635   | 1:500    | 2h, RT          | Invitrogen, A31575   |

3 Table 2: Antibodies

4 Brain sections were washed in PBS three times and blocked in 2-7% normal goat serum  
5 (NGS) solution (in 1X PBS, 0.1-0.3% Triton-X100) for 2 hours at room temperature (RT).  
6 Primary antibodies (Table 2) were diluted in blocking solution and incubated with the  
7 sections (as stated in the table). This was followed by three 30min PBS washes, and  
8 incubation in secondary antibodies (Table 2) diluted 1:500 in blocking solution, for 2 hours at  
9 RT. After two 30min PBS washes, the sections were incubated in DAPI for 30 min (1:40000  
10 dilution in PBS; Life Technologies), and mounted using ProLong Gold mounting media  
11 (Invitrogen).

## 12 *In situ hybridization*

13 *Gad1* antisense RNA probe was transcribed *in vitro* from full-length cDNA template (IMAGE  
14 ID: 5358787). The probe was diluted to a final concentration of 800ng/ml in hybridization  
15 buffer (50% formamide, 10% dextran sulphate, 1mg/ml rRNA, 1X Denhardt's solution, 0.2M  
16 NaCl, 10mM Tris HCl, 5mM NaH<sub>2</sub>PO<sub>4</sub>.2H<sub>2</sub>O, 1mM Tris base, 50mM EDTA) and applied  
17 onto the slides, which were incubated in a humidified chamber at 65°C overnight. The slides  
18 were then washed three times for 30min in wash buffer (50% formamide, 1X SSC, 0.1%  
19 Tween) at 65°C, two times for 30min in MABT buffer (100mM maleic acid, 150mM NaCl,  
20 0.1% Tween-20) at RT, and blocked for 2h at RT (2% Boehringer Blocking Reagent  
21 (Roche), 20% inactivated sheep serum in MABT). Sheep a-DIG alkaline phosphatase  
22 conjugated antibody (Roche, 11093274910) was diluted 1:2000 in the blocking solution and  
23 incubated with the slides overnight at 4°C. This was followed by five 20min washes in MABT  
24 and two 20min washes in the AP buffer (0.1M Tris-HCl pH8.2, 0.1%-Tween-20). Fast red  
25 TR/Naphthol AS-MX tablets (Sigma) were dissolved in the AP buffer and applied onto the  
26 slides for colour reaction for 3–6 hours at RT in the dark. The slides were then washed three  
27 times for 20min in PBS before proceeding with IHC for GFP as described above. *Sox14*<sup>GFP/+</sup>  
28 and *Sox14*<sup>GFP/GFP</sup> sections were always processed in parallel.

29  
30

## 1 Quantifying distribution of neuronal populations across thalamic nuclei

| Transgenic line          | Age    | Cells annotated/counted                                     | Number of brains | Sampling                               | Section thickness ( $\mu\text{m}$ ) |
|--------------------------|--------|-------------------------------------------------------------|------------------|----------------------------------------|-------------------------------------|
| Sox14 <sup>GFP/+</sup>   | P14    | GFP <sup>+</sup> and <i>Gad1</i> <sup>+</sup>               | 3                | Every 10 <sup>th</sup> coronal section | 20                                  |
| Sox14 <sup>GFP/GFP</sup> | P14    | GFP <sup>+</sup> and <i>Gad1</i> <sup>+</sup>               | 3                | Every 10 <sup>th</sup> coronal section | 20                                  |
| En1-Cre;R26Isl-GFP       | P21-30 | GFP <sup>+</sup>                                            | 3                | Every 6 <sup>th</sup> coronal section  | 60                                  |
| Dlx5/6-Cre;R26Isl-GFP    | P14    | GFP <sup>+</sup> , Pvalb <sup>+</sup> and GABA <sup>+</sup> | 3                | Every 6 <sup>th</sup> coronal section  | 60                                  |
| Pv-Cre;R26Isl-nGFP       | P14    | GFP <sup>+</sup> , Pvalb <sup>+</sup> and GABA <sup>+</sup> | 2                | Every 6 <sup>th</sup> coronal section  | 60                                  |

2 Table 3. Genetic identity of cells counted across TC regions and technical details of  
3 corresponding experiments.

4  
5 Confocal z-stacks covering the extent of the thalamus across all axes (caudo-rostral, ventro-  
6 dorsal, latero-medial) were acquired using either Nikon A1R inverted confocal, inverted  
7 spinning disk Nikon Ti microscope or Olympus VS120 slide scanner, with 10X (NA 0.30 Plan  
8 Fluor DLL) and 20X (NA 0.75 Plan Apo VC or UPLSAPO NA 0.75) objectives. The stacks  
9 were then viewed with the Neurolucida software. TC nuclei were identified from the DAPI  
10 counterstain, using cytoarchitecturally recognizable structures, such as the dLGN, the  
11 habenular complex, the TRN, the anterior pretectum and the fasciculus retroflexus (fr), as  
12 landmarks for orientation and reference. The cells of interest (Table 3) were assigned to TC  
13 regions by comparing the sections to the Allen Brain Reference Atlas and annotated and  
14 counted manually. For each brain, only one hemisphere was analysed (chosen in a  
15 randomized way). For experiments using *Gad1*<sup>+</sup> and *Chrna6*<sup>+</sup> *in situ* hybridization data from  
16 the Allen Mouse Brain Atlas resource (© 2004 Allen Institute for Brain Science. Allen Mouse  
17 Brain Atlas. Available from: [mouse.brain-map.org](http://mouse.brain-map.org); Lein et al., 2006), all images of P56  
18 C57BL/6J coronal brain sections containing the thalamus were downloaded for each gene  
19 (every 8<sup>th</sup> 25 $\mu\text{m}$ -thick section, sampling every 200 $\mu\text{m}$  across the thalamus), and analysed in  
20 the same way as described above.

### 21 3D reconstructions of cell distributions

22 3D reconstructions of cell (Table 3) distributions across thalamic regions were generated for  
23 each brain separately using the Neurolucida software (MBF Bioscience), from the acquired  
24 confocal z-stacks or Allen Mouse Brain Atlas *in situ* hybridization data as described above.  
25 For each image the outline of the thalamus and the surrounding structures was manually  
26 traced using the 'contour' function and the cells were annotated with the 'marker' function,  
27 placed at the centre of the soma. Traced images were then aligned in sequential rostro-  
28 caudal order, manually for each brain, using tissue landmarks (midline and clearly  
29 recognisable structures, e.g. dLGN, TRN, habenula, hippocampus) for reference, and their

1 spacing in the rostro-caudal dimension was preserved according to the sampling used for  
2 each brain.

3

#### 4 **Nearest Neighbour Distance calculations**

5 Nearest neighbour distance (NND) was determined for the *Sox14<sup>+</sup>Gad1<sup>+</sup>* and *Sox14<sup>-</sup>Gad1<sup>+</sup>*  
6 cells from the 3D reconstructions of their distributions. The cells' coordinates in 3D were  
7 generated by NeuroLucida and analysed using a custom Python script and the Pandas  
8 library (McKinney, 2010) to calculate NNDs separately for each group and between the two  
9 groups, for each *Sox14<sup>GFP/+</sup>* brain individually. The data was then normalised to the largest  
10 NND within each data set (each individual group and between groups sets for each brain),  
11 averaged across the brains (mean±SE) and plotted as cumulative distribution. Normalization  
12 allows us to plot their cumulative distribution as a fraction of the maximum distance, though  
13 even before normalization the curves were broadly similar. Statistically significant  
14 differences between the distributions were verified using the 2-sample Kolmogorov-Smirnov  
15 test, implemented in the SciPy library (Jones et al.).

16

#### 17 **Migrational morphology analyses**

18 E16.5, E17.5, P0.5, P1.5 (n=3 brains/developmental stage) and P2.5 (n=1) *En1-Cre;R26Isl-*  
19 *GFP* brains were quickly dissected on ice and immersed in 4% PFA for 12 hours before  
20 switching to PBS. 300µm-thick coronal sections were cut on a vibratome (Leica VT 1200S).  
21 To increase the imaging depth, the sections were cleared following the ScaleSQ protocol  
22 (Hama et al., 2015). ScaleS4 buffer was used as a mounting medium (Hama et al., 2015),  
23 and spacers were placed on the slides to prevent compressing the sections. Nikon A1R  
24 inverted confocal was used to acquire z-stacks that covered the entire extent of the  
25 thalamus for each brain, with a 20X objective (NA 0.75 Plan Apo VC). The achieved imaging  
26 depth in z ranged from 200-250µm. The stacks were imported into NeuroLucida software  
27 (MBF Bioscience) to trace the migratory morphology of GFP<sup>+</sup> cells in the dLGN, LP and VP.  
28 On average, 2 sections covered the extent of these nuclei in the rostro-caudal dimension  
29 and the first time point when GFP<sup>+</sup> cells were observed there was at E17.5. GFP<sup>+</sup> cells were  
30 not traced in the PO and MG due to their low numbers in these nuclei in the juvenile and  
31 adult brains, and the ambiguity in delineating these regions anatomically in the embryonic  
32 brains. We did not observe GFP<sup>+</sup> cells with neuronal morphology in any other TC regions  
33 (i.e. outside the FO and HO sensory thalamus) for all ages analysed. In the analysed  
34 regions (dLGN, LP, VP), all GFP<sup>+</sup> somas were annotated using the semi-automated 'Soma'  
35 function. The leading processes were traced manually with the 'Tree' function, starting in the  
36 middle of the soma and until each process could be unequivocally identified or until the point  
37 of bifurcation, for all GFP<sup>+</sup> cells with a clearly visible and identifiable leading process (44% of

1 all GFP<sup>+</sup> cells at E17.5, 30% at P0.5, 26% at P1.5, 14% at P2.5). The 3D coordinates for  
2 each leading process were then exported into Excel, and their orientation was expressed in  
3 the brain's coordinate system (x=L-M, y=V-M, z=C-R), as a vector joining the start and end  
4 point of the process, using a custom Python script and the Pandas (McKinney, 2010) and  
5 Numpy (Walt, Colbert, Varoquaux, 2011) libraries. Each vector was defined by its orientation  
6 in spherical coordinates (polar and azimuthal angle), and overall length. Population level  
7 orientation data for the dLGN, LP and VP at E17.5 and P0 was plotted as heat-maps, by  
8 binning cells according to their spherical coordinates. The bins were then integrated along  
9 each axis to reveal a dominant orientation (e.g. for the dLGN, 66% and 69% of cells oriented  
10 dorso-ventrally and caudo-rostrally, respectively). Polar histograms of leading process  
11 orientation in the dorsal-ventral-lateral-medial plane were also produced.

12

### 13 **Spatial clustering analysis**

14 Unsupervised machine learning methods were used to investigate spatial organization of  
15 Sox14<sup>+</sup>Gad1<sup>+</sup> and Sox14<sup>-</sup>Gad1<sup>+</sup> cells. The 3D models of P14 Sox14<sup>GFP/+</sup> thalamus generated  
16 with NeuroLucida for NND analysis were again used to obtain the coordinates of all thalamic  
17 interneurons.

18 These data were analysed separately for each brain (n=3) using a custom Python script, and  
19 partitioned into clusters using the k-Means algorithm implemented in the library Scikit-Learn  
20 (Buitinck et al., 2013). The algorithm takes as input the expected number of clusters  $k$ .

21 Multiple values of  $k$  were tested, and evaluated using the silhouette coefficient metric of  
22 clustering performance (Rousseeuw, 1987), also implemented in Scikit-Learn. The silhouette  
23 coefficient is equal to the average ratio of distances between points within and between  
24 each cluster. More positive scores indicate coherent, well-separated clusters, whereas  
25 scores close to zero indicate overlapping clusters. The score was highest (0.472±0.012) for  
26  $k=2$ , and the average fraction of all Sox14<sup>+</sup> and Sox14<sup>-</sup> cells in each of the resulting clusters  
27 was computed across all brains.

28 We also performed k-Means clustering on the 3D distribution of Gad1<sup>+</sup> cells obtained from *in*  
29 *situ* hybridisation data from the Allen Mouse Brain Atlas. The silhouette score was again  
30 highest (0.512) for  $k=2$ , and the resulting clusters have a spatial definition similar to those  
31 from the P14 Sox14<sup>GFP/+</sup> thalamus.

32

### 33 **Statistics**

#### 34 *Comparison of distributions*

35 The Chi-squared test was used to test for significant differences in the thalamus-wide  
36 distribution of specific cell classes. This thalamus-wide comparison compensates for

1 categorical errors arising from a degree of uncertainty in nuclear boundaries, as a result of  
2 variation in the sectioning plane and other factors.

3 For each distribution, average relative cell numbers were computed in Excel. A custom  
4 python script was used to compute the Chi-squared statistic, and the corresponding p-value  
5 was computed using the Chi-squared cumulative density function implemented in SciPy  
6 (Jones et al.).

#### 7 *Change in interneuron numbers in the Sox14 knockout*

8 Unpaired two-sample two-tailed t-test was used, comparing the *Sox14* knockout to  
9 *Sox14<sup>GFP/+</sup>* for each interneuron class separately (n=3 brains/genotype). Total interneuron  
10 numbers across all TC nuclei were compared and sampling was consistent between  
11 genotypes (each 10<sup>th</sup> thalamic section was analysed for each brain).

12 Other statistical analyses used in the study are described in the corresponding sections  
13 (Nearest Neighbour Distance calculations and Spatial clustering analysis).

14

#### 15 **Acknowledgments**

16 We thank the Wohl Cellular Imaging Centre, King's College London for support with imaging  
17 and image analysis software. This work was funded by the Biotechnology and Biological  
18 Sciences Research Council (BBSRC) grants BB/L020068/1 and BB/R007020/1 to A.D.

19

#### 20 **Author Contributions**

21 Conceptualization, P.J. and A.D.; Investigation and analysis, P.J., P.C. and X.D.; Resources,  
22 T.S. and A.D.; Writing, P.J. and A.D.

23

#### 24 **Competing Interests**

25 The authors declare no competing interests.

26

#### 27 **References**

- 28 Achim, K., Peltopuro, P., Lahti, L., Tsai, H.-H., Zachariah, A., Astrand, M., ... Partanen, J.  
29 (2013). The role of Tal2 and Tal1 in the differentiation of midbrain GABAergic neuron  
30 precursors. *Biology Open*, 2(10), 990–997. <https://doi.org/10.1242/bio.20135041>  
31 Achim, K., Salminen, M., & Partanen, J. (2014). Mechanisms regulating GABAergic neuron  
32 development. *Cellular and Molecular Life Sciences*, 71(8), 1395–1415.  
33 <https://doi.org/10.1007/s00018-013-1501-3>  
34 Arcelli, P., Frassoni, C., Regondi, M. C., De Biasi, S., & Spreafico, R. (1997). GABAergic  
35 neurons in mammalian thalamus: a marker of thalamic complexity? *Brain Research*  
36 *Bulletin*, 42(1), 27–37. Retrieved from <http://www.ncbi.nlm.nih.gov/pubmed/8978932>  
37 Arendt, D., Bertucci, P. Y., Achim, K., & Musser, J. M. (2019). Evolution of neuronal types  
38 and families. *Current Opinion in Neurobiology*, 56, 144–152.  
39 <https://doi.org/https://doi.org/10.1016/j.conb.2019.01.022>

- 1 Armstrong, E. (1979). A quantitative comparison of the hominoid thalamus. I. Specific  
2 sensory relay nuclei. *American Journal of Physical Anthropology*, 51(3), 365–381.  
3 <https://doi.org/10.1002/ajpa.1330510308>
- 4 Baldwin, M. K. L., Balaram, P., & Kaas, J. H. (2017). The evolution and functions of nuclei of  
5 the visual pulvinar in primates. *Journal of Comparative Neurology*, 525(15), 3207–3226.  
6 <https://doi.org/10.1002/cne.24272>
- 7 Bickford, M. E., Wei, H., Eisenback, M. A., Chomsung, R. D., Slusarczyk, A. S., & Dankowski,  
8 A. B. (2008). Synaptic organization of thalamocortical axon collaterals in the  
9 perigeniculate nucleus and dorsal lateral geniculate nucleus. *The Journal of*  
10 *Comparative Neurology*, 508(2), 264–285. <https://doi.org/10.1002/cne.21671>
- 11 Bickford, M. E., Slusarczyk, A., Dilger, E. K., Krahe, T. E., Kucuk, C., & Guido, W. (2010).  
12 Synaptic development of the mouse dorsal lateral geniculate nucleus. *Journal of*  
13 *Comparative Neurology*, 518(5), 622–635. <https://doi.org/10.1002/cne.22223>
- 14 Bolkan, S. S., Stujenske, J. M., Parnaudeau, S., Spellman, T. J., Rauffenbart, C., Abbas, A.  
15 I., ... Kellendonk, C. (2017). Thalamic projections sustain prefrontal activity during  
16 working memory maintenance. *Nature Neuroscience*, 20, 987. Retrieved from  
17 <https://doi.org/10.1038/nn.4568>
- 18 Braak, H., & Bachmann, A. (1985). The percentage of projection neurons and interneurons  
19 in the human lateral geniculate nucleus. *Human Neurobiology*, 4(2), 91–95.  
20 <http://europepmc.org/abstract/MED/4030427>
- 21 Buitinck, L., Louppe, G., Blondel, M., Pedregosa, F., Mueller, A., Grisel, O., ... Varoquaux,  
22 G. (2013). API design for machine learning software: experiences from the scikit-learn  
23 project. In *ECML PKDD Workshop: Languages for Data Mining and Machine Learning*  
24 (pp. 108–122).
- 25 Butler, A. B. (2008). Evolution of the thalamus: a morphological and functional review.  
26 *Thalamus & Related Systems*, 4(1), 35–58. [https://doi.org/DOI:](https://doi.org/DOI:10.1017/S1472928808000356)  
27 [10.1017/S1472928808000356](https://doi.org/DOI:10.1017/S1472928808000356)
- 28 Cheong, S. K., Tailby, C., Solomon, S. G., & Martin, P. R. (2013). Cortical-Like Receptive  
29 Fields in the Lateral Geniculate Nucleus of Marmoset Monkeys. *The Journal of*  
30 *Neuroscience*, 33(16), 6864 LP – 6876. [https://doi.org/10.1523/JNEUROSCI.5208-](https://doi.org/10.1523/JNEUROSCI.5208-12.2013)  
31 [12.2013](https://doi.org/10.1523/JNEUROSCI.5208-12.2013)
- 32 Clascá, F., Rubio-Garrido, P., & Jabaudon, D. (2012). Unveiling the diversity of  
33 thalamocortical neuron subtypes. *European Journal of Neuroscience*, 35(10), 1524–  
34 1532. <https://doi.org/10.1111/j.1460-9568.2012.08033.x>
- 35 Clemente-Perez, A., Makinson, S. R., Higashikubo, B., Brovarney, S., Cho, F. S., Urry, A.,  
36 ... Paz, J. T. (2017). Distinct Thalamic Reticular Cell Types Differentially Modulate  
37 Normal and Pathological Cortical Rhythms. *Cell Reports*, 19(10), 2130–2142.  
38 <https://doi.org/https://doi.org/10.1016/j.celrep.2017.05.044>
- 39 Crone, S. A., Quinlan, K. A., Zagoraïou, L., Droho, S., Restrepo, C. E., Lundfald, L., ...  
40 Sharma, K. (2008). Genetic ablation of V2a ipsilateral interneurons disrupts left-right  
41 locomotor coordination in mammalian spinal cord. *Neuron*, 60(1), 70–83.  
42 <https://doi.org/10.1016/j.neuron.2008.08.009>
- 43 Delogu, A., Sellers, K., Zagoraïou, L., Bocianowska-Zbrog, A., Mandal, S., Guimera, J., ...  
44 Lumsden, A. (2012). Subcortical Visual Shell Nuclei Targeted by ipRGCs Develop from  
45 a Sox14+-GABAergic Progenitor and Require Sox14 to Regulate Daily Activity  
46 Rhythms. *Neuron*, 75(4), 648–662. <https://doi.org/10.1016/j.neuron.2012.06.013>
- 47 Deneris, E. S., & Hobert, O. (2014). Maintenance of postmitotic neuronal cell identity. *Nature*  
48 *Neuroscience*, 17(7), 899–907. <https://doi.org/10.1038/nn.3731>
- 49 Eisenstat, D. D., Liu, J. K., Mione, M., Zhong, W., Yu, G., Anderson, S. A., ... Rubenstein, J.  
50 L. R. (1999). DLX-1, DLX-2, and DLX-5 expression define distinct stages of basal  
51 forebrain differentiation. *Journal of Comparative Neurology*, 414(2), 217–237.  
52 [https://doi.org/10.1002/\(SICI\)1096-9861\(19991115\)414:2<217::AID-CNE6>3.0.CO;2-I](https://doi.org/10.1002/(SICI)1096-9861(19991115)414:2<217::AID-CNE6>3.0.CO;2-I)
- 53 Evangelio, M., García-Amado, M., & Clascá, F. (2018). Thalamocortical Projection Neuron  
54 and Interneuron Numbers in the Visual Thalamic Nuclei of the Adult C57BL/6 Mouse .

- 1 *Frontiers in Neuroanatomy*, Vol. 12, p. 27. Retrieved from  
2 <https://www.frontiersin.org/article/10.3389/fnana.2018.00027>
- 3 Frangeul, L., Pouchelon, G., Telley, L., Lefort, S., Luscher, C., & Jabaudon, D. (2016). A  
4 cross-modal genetic framework for the development and plasticity of sensory pathways.  
5 *Nature*, 538(7623), 96–98. <https://doi.org/10.1038/nature19770>
- 6 Golden, J. A., & Cepko, C. L. (1996). Clones in the chick diencephalon contain multiple cell  
7 types and siblings are widely dispersed. *Development*, 122(1), 65–78. Retrieved from  
8 <http://www.ncbi.nlm.nih.gov/pubmed/8565854>
- 9 Golding, B., Pouchelon, G., Bellone, C., Murthy, S., Di Nardo, A. A., Govindan, S., ...  
10 Jabaudon, D. (2014). Retinal Input Directs the Recruitment of Inhibitory Interneurons  
11 into Thalamic Visual Circuits. *Neuron*, 81(5), 1057–1069.  
12 <https://doi.org/10.1016/j.neuron.2014.01.032>
- 13 Granda, R. H., & Crossland, W. J. (1989). GABA-like immunoreactivity of neurons in the  
14 chicken diencephalon and mesencephalon. *Journal of Comparative Neurology*, 287(4),  
15 455–469. <https://doi.org/10.1002/cne.902870405>
- 16 Groh, A., Bokor, H., Mease, R. A., Plattner, V. M., Hangya, B., Stroh, A., ... Acsády, L.  
17 (2014). Convergence of cortical and sensory driver inputs on single thalamocortical  
18 cells. *Cerebral Cortex*, 24(12), 3167–3179. <https://doi.org/10.1093/cercor/bht173>
- 19 Guillery, R. W. (1995). Anatomical evidence concerning the role of the thalamus in  
20 corticocortical communication: a brief review. *Journal of Anatomy*, 187 ( Pt 3(Pt 3),  
21 583–592. Retrieved from <https://www.ncbi.nlm.nih.gov/pubmed/8586557>
- 22 Guillery, R. W., & Sherman, S. M. (2002). Thalamic Relay Functions and Their Role in  
23 Corticocortical Communication: Generalizations from the Visual System. *Neuron*, 33(2),  
24 163–175. [https://doi.org/https://doi.org/10.1016/S0896-6273\(01\)00582-7](https://doi.org/https://doi.org/10.1016/S0896-6273(01)00582-7)
- 25 Guo, Q., & Li, J. Y. H. (2019). Defining developmental diversification of diencephalon  
26 neurons through single-cell gene expression profiling. *Development*, dev.174284.  
27 <https://doi.org/10.1242/dev.174284>
- 28 Guo, Z. V., Inagaki, H. K., Daie, K., Druckmann, S., Gerfen, C. R., & Svoboda, K. (2017).  
29 Maintenance of persistent activity in a frontal thalamocortical loop. *Nature*, 545, 181.  
30 Retrieved from <https://doi.org/10.1038/nature22324>
- 31 Halassa, M. M., & Kastner, S. (2017). Thalamic functions in distributed cognitive control.  
32 *Nature Neuroscience*, 20(12), 1669–1679. <https://doi.org/10.1038/s41593-017-0020-1>
- 33 Halley, A. C., & Krubitzer, L. (2019). Not all cortical expansions are the same: the  
34 coevolution of the neocortex and the dorsal thalamus in mammals. *Current Opinion in*  
35 *Neurobiology*, 56, 78–86. <https://doi.org/https://doi.org/10.1016/j.conb.2018.12.003>
- 36 Hama, H., Hioki, H., Namiki, K., Hoshida, T., Kurokawa, H., Ishidate, F., ... Miyawaki, A.  
37 (2015). ScaleS: an optical clearing palette for biological imaging. *Nature Neuroscience*,  
38 18, 1518. Retrieved from <https://doi.org/10.1038/nn.4107>
- 39 Hayes, S. G., Murray, K. D., & Jones, E. G. (2003). Two epochs in the development of  
40 gamma-aminobutyric acidergic neurons in the ferret thalamus. *The Journal of*  
41 *Comparative Neurology*, 463(1), 45–65. <https://doi.org/10.1002/cne.10749>
- 42 Herkenham, M. (1980). Laminar organization of thalamic projections to the rat neocortex.  
43 *Science*, 207(4430), 532 LP – 535. <https://doi.org/10.1126/science.7352263>
- 44 Hippenmeyer, S., Vrieseling, E., Sigrist, M., Portmann, T., Laengle, C., Ladle, D. R., & Arber, S.  
45 (2005). A developmental switch in the response of DRG neurons to ETS  
46 transcription factor signaling. *PLoS Biology*, 3(5), e159–e159.  
47 <https://doi.org/10.1371/journal.pbio.0030159>
- 48 Hirsch, J. A., Wang, X., Sommer, F. T., & Martinez, L. M. (2015). How Inhibitory Circuits in  
49 the Thalamus Serve Vision. *Annual Review of Neuroscience*, 38(1), 309–329.  
50 <https://doi.org/10.1146/annurev-neuro-071013-014229>
- 51 Hubel, D. H., & Wiesel, T. N. (1962). Receptive fields, binocular interaction and functional  
52 architecture in the cat's visual cortex. *The Journal of Physiology*, 160(1), 106–154.  
53 Retrieved from <https://www.ncbi.nlm.nih.gov/pubmed/14449617>

- 1 Hunnicutt, B. J., Long, B. R., Kusefoglu, D., Gertz, K. J., Zhong, H., & Mao, T. (2014). A  
2 comprehensive thalamocortical projection map at the mesoscopic level. *Nature*  
3 *Neuroscience*, 17(9), 1276–1285. <https://doi.org/10.1038/nn.3780>
- 4 Jager, P., Ye, Z., Yu, X., Zagoraïou, L., Prekop, H.-T., Partanen, J., ... Delogu, A. (2016).  
5 Tectal-derived interneurons contribute to phasic and tonic inhibition in the visual  
6 thalamus. *Nature Communications*, 7, 13579. <https://doi.org/10.1038/ncomms13579>
- 7 Jones, E. (2002). Dichronous appearance and unusual origins of GABA neurons during  
8 development of the mammalian thalamus. *Thalamus & Related Systems*, 1(4), 283–  
9 288. [https://doi.org/10.1016/S1472-9288\(02\)00002-X](https://doi.org/10.1016/S1472-9288(02)00002-X)
- 10 Jones, E. G. (2007). *The thalamus* (2nd ed.). Retrieved from  
11 [http://www.cambridge.org/us/academic/subjects/life-sciences/neuroscience/thalamus-](http://www.cambridge.org/us/academic/subjects/life-sciences/neuroscience/thalamus-2nd-edition?format=W&isbn=9780521858816#GsbwSMU183VqWWXZ.97)  
12 [2nd-edition?format=W&isbn=9780521858816#GsbwSMU183VqWWXZ.97](http://www.cambridge.org/us/academic/subjects/life-sciences/neuroscience/thalamus-2nd-edition?format=W&isbn=9780521858816#GsbwSMU183VqWWXZ.97)
- 13 Jones, E., Oliphant, T., Peterson, P., & others. (n.d.). SciPy: Open source scientific tools for  
14 Python. Retrieved from <http://www.scipy.org/>
- 15 Kenigfest, N. B., Repérant, J., Rio, J.-P., Belekova, M. G., Tumanova, N. L., Ward, R., ...  
16 Ozirskaya, E. V. (1995). Fine structure of the dorsal lateral geniculate nucleus of the  
17 turtle, *Emys orbicularis*: A Golgi, combined hrp tracing and GABA immunocytochemical  
18 study. *Journal of Comparative Neurology*, 356(4), 595–614.  
19 <https://doi.org/10.1002/cne.903560409>
- 20 Kenigfest, N. B., Repérant, J., Rio, J.-P., Belekova, M. G., Ward, R., Vesselkin, N. P., ...  
21 Herbin, M. (1998). Retinal and cortical afferents to the dorsal lateral geniculate nucleus  
22 of the turtle, *Emys orbicularis*: A combined axonal tracing, glutamate, and GABA  
23 immunocytochemical electron microscopic study. *Journal of Comparative Neurology*,  
24 391(4), 470–490. [https://doi.org/10.1002/\(SICI\)1096-9861\(19980222\)391:4<470::AID-](https://doi.org/10.1002/(SICI)1096-9861(19980222)391:4<470::AID-CNE5>3.0.CO;2-Y)  
25 [CNE5>3.0.CO;2-Y](https://doi.org/10.1002/(SICI)1096-9861(19980222)391:4<470::AID-CNE5>3.0.CO;2-Y)
- 26 Kimmel, R. A., Turnbull, D. H., Blanquet, V., Wurst, W., Loomis, C. A., & Joyner, A. L.  
27 (2000). Two lineage boundaries coordinate vertebrate apical ectodermal ridge  
28 formation. *Genes & Development*, 14(11), 1377–1389.  
29 <https://doi.org/10.1101/gad.14.11.1377>
- 30 Lein, E. S., Hawrylycz, M. J., Ao, N., Ayres, M., Bensinger, A., Bernard, A., ... Jones, A. R.  
31 (2006). Genome-wide atlas of gene expression in the adult mouse brain. *Nature*, 445,  
32 168. Retrieved from <https://doi.org/10.1038/nature05453>
- 33 Letinić, K., & Kostović, I. (1997). Transient fetal structure, the gangliothalamic body,  
34 connects telencephalic germinal zone with all thalamic regions in the developing human  
35 brain. *Journal of Comparative Neurology*, 384(3), 373–395.  
36 [https://doi.org/10.1002/\(SICI\)1096-9861\(19970804\)384:3<373::AID-CNE5>3.0.CO;2-0](https://doi.org/10.1002/(SICI)1096-9861(19970804)384:3<373::AID-CNE5>3.0.CO;2-0)
- 37 Letinic, K., & Rakic, P. (2001). Telencephalic origin of human thalamic GABAergic neurons.  
38 *Nature Neuroscience*, 4(9), 931–936. <https://doi.org/10.1038/nn0901-931>
- 39 Ling, S., Pratte, M. S., & Tong, F. (2015). Attention alters orientation processing in the  
40 human lateral geniculate nucleus. *Nature Neuroscience*, 18(4), 496–498.  
41 <https://doi.org/10.1038/nn.3967>
- 42 Marín, O., & Rubenstein, J. L. R. (2001). A long, remarkable journey: Tangential migration in  
43 the telencephalon. *Nature Reviews Neuroscience*, 2(11), 780–790.  
44 <https://doi.org/10.1038/35097509>
- 45 Martinez, S., & Alvarado-Mallart, R. M. (1989). Transplanted mesencephalic quail cells  
46 colonize selectively all primary visual nuclei of chick diencephalon: a study using  
47 heterotopic transplants. *Brain Research. Developmental Brain Research*, 47(2), 263–  
48 274. Retrieved from <http://www.ncbi.nlm.nih.gov/pubmed/2519511>
- 49 Mayer, C., Hafemeister, C., Bandler, R. C., Machold, R., Batista Brito, R., Jaglin, X., ...  
50 Satija, R. (2018). Developmental diversification of cortical inhibitory interneurons.  
51 *Nature*, 555, 457. Retrieved from <https://doi.org/10.1038/nature25999>
- 52 McKinney, W. (2010). Data Structures for Statistical Computing in Python. In S. van der Walt  
53 & J. Millman (Eds.), *Proceedings of the 9th Python in Science Conference* (pp. 51–56).



- 1 Métin, C., Alvarez, C., Moudoux, D., Vitalis, T., Pieau, C., & Molnár, Z. (2007). Conserved  
2 pattern of tangential neuronal migration during forebrain development. *Development*,  
3 134(15), 2815 LP – 2827. <https://doi.org/10.1242/dev.02869>
- 4 Mi, D., Li, Z., Lim, L., Li, M., Moissidis, M., Yang, Y., ... Marín, O. (2018). Early emergence  
5 of cortical interneuron diversity in the mouse embryo. *Science*, 360(6384), 81 LP – 85.  
6 <https://doi.org/10.1126/science.aar6821>
- 7 Miller, J. A., Ding, S.-L., Sunkin, S. M., Smith, K. A., Ng, L., Szafer, A., ... Lein, E. S. (2014).  
8 Transcriptional landscape of the prenatal human brain. *Nature*, 508, 199. Retrieved  
9 from <https://doi.org/10.1038/nature13185>
- 10 Mo, A., Mukamel, E. A., Davis, F. P., Luo, C., Henry, G. L., Picard, S., ... Nathans, J. (2015).  
11 Epigenomic Signatures of Neuronal Diversity in the Mammalian Brain. *Neuron*, 86(6),  
12 1369–1384. <https://doi.org/10.1016/j.neuron.2015.05.018>
- 13 Monory, K., Massa, F., Egertová, M., Eder, M., Blaudzun, H., Westenbroek, R., ... Lutz, B.  
14 (2006). The endocannabinoid system controls key epileptogenic circuits in the  
15 hippocampus. *Neuron*, 51(4), 455–466. <https://doi.org/10.1016/j.neuron.2006.07.006>
- 16 Montero, V. M. (1987). Ultrastructural identification of synaptic terminals from the axon of  
17 type 3 interneurons in the cat lateral geniculate nucleus. *Journal of Comparative*  
18 *Neurology*, 264(2), 268–283. <https://doi.org/10.1002/cne.902640210>
- 19 Paredes, M. F., James, D., Gil-Perotin, S., Kim, H., Cotter, J. A., Ng, C., ... Alvarez-Buylla,  
20 A. (2016). Extensive migration of young neurons into the infant human frontal lobe.  
21 *Science*, 354(6308), aaf7073. <https://doi.org/10.1126/science.aaf7073>
- 22 Pasik, P., Pasik, T., & Hámori, J. (1976). Synapses between interneurons in the lateral  
23 geniculate nucleus of monkeys. *Experimental Brain Research*, 25(1), 1–13. Retrieved  
24 from <http://www.ncbi.nlm.nih.gov/pubmed/817920>
- 25 Piscopo, D. M., El-Danaf, R. N., Huberman, A. D., & Niell, C. M. (2013). Diverse Visual  
26 Features Encoded in Mouse Lateral Geniculate Nucleus. *The Journal of Neuroscience*,  
27 33(11), 4642 LP – 4656. <https://doi.org/10.1523/JNEUROSCI.5187-12.2013>
- 28 Pouchelon, G., Gambino, F., Bellone, C., Telley, L., Vitali, I., Lüscher, C., ... Jabaudon, D.  
29 (2014). Modality-specific thalamocortical inputs instruct the identity of postsynaptic L4  
30 neurons. *Nature*, 511, 471. Retrieved from <https://doi.org/10.1038/nature13390>
- 31 Prekop, H.-T., Kroiss, A., Rook, V., Zagoraïou, L., Jessell, T. M., Fernandes, C., ... Wingate,  
32 R. J. T. (2018). Sox14 Is Required for a Specific Subset of Cerebello–Olivary  
33 Projections. *The Journal of Neuroscience*, 38(44), 9539 LP – 9550.  
34 <https://doi.org/10.1523/JNEUROSCI.1456-18.2018>
- 35 Pritz, M. B., & Stritzel, M. E. (1994). Morphological and GAD immunocytochemical  
36 properties of the dorsal lateral geniculate nucleus in a reptile. *Brain Research Bulletin*,  
37 33(6), 723–726. [https://doi.org/10.1016/0361-9230\(94\)90239-9](https://doi.org/10.1016/0361-9230(94)90239-9)
- 38 Puelles, L., & Rubenstein, J. L. R. (2003). Forebrain gene expression domains and the  
39 evolving prosomeric model. *Trends in Neurosciences*, 26(9), 469–476.  
40 [https://doi.org/10.1016/S0166-2236\(03\)00234-0](https://doi.org/10.1016/S0166-2236(03)00234-0)
- 41 Rakić, P., & Sidman, R. L. (1969). Telencephalic origin of pulvinar neurons in the fetal  
42 human brain. *Zeitschrift Für Anatomie Und Entwicklungsgeschichte*, 129(1), 53–82.  
43 <https://doi.org/10.1007/BF00521955>
- 44 Rikhye, R. V., Gilra, A., & Halassa, M. M. (2018). Thalamic regulation of switching between  
45 cortical representations enables cognitive flexibility. *Nature Neuroscience*, 21(12),  
46 1753–1763. <https://doi.org/10.1038/s41593-018-0269-z>
- 47 Rikhye, R. V., Wimmer, R. D., & Halassa, M. M. (2018). Toward an Integrative Theory of  
48 Thalamic Function. *Annual Review of Neuroscience*, 41(1), 163–183.  
49 <https://doi.org/10.1146/annurev-neuro-080317-062144>
- 50 Rio, J.-P., Reperant, J., Ward, R., Miceli, D., & Medina, M. (1992). Evidence of GABA-  
51 immunopositive neurons in the dorsal part of the lateral geniculate nucleus of reptiles:  
52 Morphological correlates with interneurons. *Neuroscience*, 47(2), 395–407.  
53 [https://doi.org/10.1016/0306-4522\(92\)90254-Y](https://doi.org/10.1016/0306-4522(92)90254-Y)

- 1 Roth, M. M., Dahmen, J. C., Muir, D. R., Imhof, F., Martini, F. J., & Hofer, S. B. (2015).  
2 Thalamic nuclei convey diverse contextual information to layer 1 of visual cortex.  
3 *Nature Neuroscience*, 19(2), 299–307. <https://doi.org/10.1038/nn.4197>
- 4 Rousseeuw, P. J. (1987). Silhouettes: A graphical aid to the interpretation and validation of  
5 cluster analysis. *Journal of Computational and Applied Mathematics*, 20, 53–65.  
6 [https://doi.org/https://doi.org/10.1016/0377-0427\(87\)90125-7](https://doi.org/https://doi.org/10.1016/0377-0427(87)90125-7)
- 7 Rubio-Garrido, P., Pérez-de-Manzo, F., Porrero, C., Galazo, M. J., & Clascá, F. (2009).  
8 Thalamic Input to Distal Apical Dendrites in Neocortical Layer 1 Is Massive and Highly  
9 Convergent. *Cerebral Cortex*, 19(10), 2380–2395.  
10 <https://doi.org/10.1093/cercor/bhn259>
- 11 Saalman, Y. B., & Kastner, S. (2011). Cognitive and Perceptual Functions of the Visual  
12 Thalamus. *Neuron*, 71(2), 209–223. <https://doi.org/10.1016/j.neuron.2011.06.027>
- 13 Saunders, A., Macosko, E. Z., Wysoker, A., Goldman, M., Krienen, F. M., de Rivera, H., ...  
14 McCarroll, S. A. (2018). Molecular Diversity and Specializations among the Cells of the  
15 Adult Mouse Brain. *Cell*, 174(4), 1015-1030.e16.  
16 <https://doi.org/https://doi.org/10.1016/j.cell.2018.07.028>
- 17 Schmitt, L. I., Wimmer, R. D., Nakajima, M., Happ, M., Mofakham, S., & Halassa, M. M.  
18 (2017). Thalamic amplification of cortical connectivity sustains attentional control.  
19 *Nature*, 545(7653), 219–223. <https://doi.org/10.1038/nature22073>
- 20 Seabrook, T. A., El-Danaf, R. N., Krahe, T. E., Fox, M. A., & Guido, W. (2013). Retinal Input  
21 Regulates the Timing of Corticogeniculate Innervation. *Journal of Neuroscience*,  
22 33(24), 10085–10097. <https://doi.org/10.1523/JNEUROSCI.5271-12.2013>
- 23 Seabrook, T. A., Krahe, T. E., Govindaiah, G., & Guido, W. (2013). Interneurons in the  
24 mouse visual thalamus maintain a high degree of retinal convergence throughout  
25 postnatal development. *Neural Development*, 8(1), 24. [https://doi.org/10.1186/1749-](https://doi.org/10.1186/1749-8104-8-24)  
26 [8104-8-24](https://doi.org/10.1186/1749-8104-8-24)
- 27 Sgaier, S. K., Lao, Z., Villanueva, M. P., Berenshteyn, F., Stephen, D., Turnbull, R. K., &  
28 Joyner, A. L. (2007). Genetic subdivision of the tectum and cerebellum into functionally  
29 related regions based on differential sensitivity to engrailed proteins. *Development*,  
30 134(12), 2325–2335. <https://doi.org/10.1242/dev.000620>
- 31 Shatz, C. J. (1996). Emergence of order in visual system development. *Proceedings of the*  
32 *National Academy of Sciences*, 93(2), 602 LP – 608.  
33 <https://doi.org/10.1073/pnas.93.2.602>
- 34 Sherman, S. M., & Guillery, R. W. (2002). The role of the thalamus in the flow of information  
35 to the cortex. *Philosophical Transactions of the Royal Society of London. Series B:*  
36 *Biological Sciences*, 357(1428), 1695–1708. <https://doi.org/10.1098/rstb.2002.1161>
- 37 Sherman, S. M. (2016). Thalamus plays a central role in ongoing cortical functioning. *Nature*  
38 *Neuroscience*, 16(4), 533–541. <https://doi.org/10.1038/nn.4269>
- 39 Sherman, S. M. (2004). Interneurons and triadic circuitry of the thalamus. *Trends in*  
40 *Neurosciences*, 27(11), 670–675. <https://doi.org/10.1016/j.tins.2004.08.003>
- 41 Shi, W., Xianyu, A., Han, Z., Tang, X., Li, Z., Zhong, H., ... Shi, S.-H. (2017). Ontogenetic  
42 establishment of order-specific nuclear organization in the mammalian thalamus.  
43 *Nature Neuroscience*, 20(4), 516–528. <https://doi.org/10.1038/nn.4519>
- 44 Shimogori, T., Abe, A., Go, Y., Hashikawa, T., Kishi, N., Kikuchi, S. S., ... Okano, H. (2018).  
45 Digital gene atlas of neonate common marmoset brain. *Neuroscience Research*, 128,  
46 1–13. <https://doi.org/https://doi.org/10.1016/j.neures.2017.10.009>
- 47 Sousa, V. H., Miyoshi, G., Hjerling-Leffler, J., Karayannis, T., & Fishell, G. (2009).  
48 Characterization of Nkx6-2-Derived Neocortical Interneuron Lineages. *Cerebral Cortex*,  
49 19(suppl\_1), i1–i10. <https://doi.org/10.1093/cercor/bhp038>
- 50 Stephan, H., Frahm, H., & Baron, G. (1981). New and Revised Data on Volumes of Brain  
51 Structures in Insectivores and Primates. *Folia Primatologica*, 35(1), 1–29.  
52 <https://doi.org/10.1159/000155963>

- 1 Stühmer, T., Puelles, L., Ekker, M., & Rubenstein, J. L. R. (2002). Expression from a Dlx  
2 Gene Enhancer Marks Adult Mouse Cortical GABAergic Neurons. *Cerebral Cortex*,  
3 12(1), 75–85. <https://doi.org/10.1093/cercor/12.1.75>
- 4 Sugahara, F., Murakami, Y., Pascual-Anaya, J., & Kuratani, S. (2017). Reconstructing the  
5 ancestral vertebrate brain. *Development, Growth & Differentiation*, 59(4), 163–174.  
6 <https://doi.org/10.1111/dgd.12347>
- 7 Sugahara, F., Pascual-Anaya, J., Oisi, Y., Kuraku, S., Aota, S., Adachi, N., ... Kuratani, S.  
8 (2016). Evidence from cyclostomes for complex regionalization of the ancestral  
9 vertebrate brain. *Nature*, 531, 97. Retrieved from <https://doi.org/10.1038/nature16518>
- 10 Tasic, B., Menon, V., Nguyen, T. N., Kim, T. K., Jarsky, T., Yao, Z., ... Zeng, H. (2016).  
11 Adult mouse cortical cell taxonomy revealed by single cell transcriptomics. *Nature*  
12 *Neuroscience*, 19(2), 335–346. <https://doi.org/10.1038/nn.4216>
- 13 Tasic, B., Yao, Z., Graybiel, L. T., Smith, K. A., Nguyen, T. N., Bertagnolli, D., ... Zeng, H.  
14 (2018). Shared and distinct transcriptomic cell types across neocortical areas. *Nature*,  
15 563(7729), 72–78. <https://doi.org/10.1038/s41586-018-0654-5>
- 16 Thompson, A. D., Picard, N., Min, L., Fagiolini, M., & Chen, C. (2016). Cortical Feedback  
17 Regulates Feedforward Retinogeniculate Refinement. *Neuron*, 91(5), 1021–1033.  
18 <https://doi.org/10.1016/j.neuron.2016.07.040>
- 19 Tosches, M. A., Yamawaki, T. M., Naumann, R. K., Jacobi, A. A., Tushev, G., & Laurent, G.  
20 (2018). Evolution of pallium, hippocampus, and cortical cell types revealed by single-  
21 cell transcriptomics in reptiles. *Science*, 360(6391), 881 LP – 888.  
22 <https://doi.org/10.1126/science.aar4237>
- 23 Tremblay, R., Lee, S., & Rudy, B. (2016). GABAergic Interneurons in the Neocortex: From  
24 Cellular Properties to Circuits. *Neuron*, 91(2), 260–292.  
25 <https://doi.org/10.1016/j.neuron.2016.06.033>
- 26 Van der Loos, H., & Woolsey, T. A. (1973). Somatosensory Cortex: Structural Alterations  
27 following Early Injury to Sense Organs. *Science*, 179(4071), 395 LP – 398.  
28 <https://doi.org/10.1126/science.179.4071.395>
- 29 Veenman, C. L., & Reiner, A. (1994). The distribution of GABA-containing perikarya, fibers,  
30 and terminals in the forebrain and midbrain of pigeons, with particular reference to the  
31 basal ganglia and its projection targets. *Journal of Comparative Neurology*, 339(2),  
32 209–250. <https://doi.org/10.1002/cne.903390205>
- 33 Walt, S. van der, Colbert, S. C., & Varoquaux, G. (2011). The NumPy Array: A Structure for  
34 Efficient Numerical Computation. *Computing in Science & Engineering*, 13(2), 22–30.  
35 <https://doi.org/10.1109/MCSE.2011.37>
- 36 Wang, S., Eisenback, M. A., & Bickford, M. E. (2002). Relative distribution of synapses in the  
37 pulvinar nucleus of the cat: Implications regarding the “driver/modulator” theory of  
38 thalamic function. *Journal of Comparative Neurology*, 454(4), 482–494.  
39 <https://doi.org/10.1002/cne.10453>
- 40 Wong, S. Z. H., Scott, E. P., Mu, W., Guo, X., Borgenheimer, E., Freeman, M., ...  
41 Nakagawa, Y. (2018). In vivo clonal analysis reveals spatiotemporal regulation of  
42 thalamic nucleogenesis. *PLOS Biology*, 16(4), e2005211. Retrieved from  
43 <https://doi.org/10.1371/journal.pbio.2005211>
- 44 Zeater, N., Cheong, S. K., Solomon, S. G., Dreher, B., & Martin, P. R. (2015). Binocular  
45 Visual Responses in the Primate Lateral Geniculate Nucleus. *Current Biology*, 25(24),  
46 3190–3195. <https://doi.org/10.1016/j.cub.2015.10.033>

47  
48  
49  
50  
51  
52  
53

1 **Supplementary Figures**

2

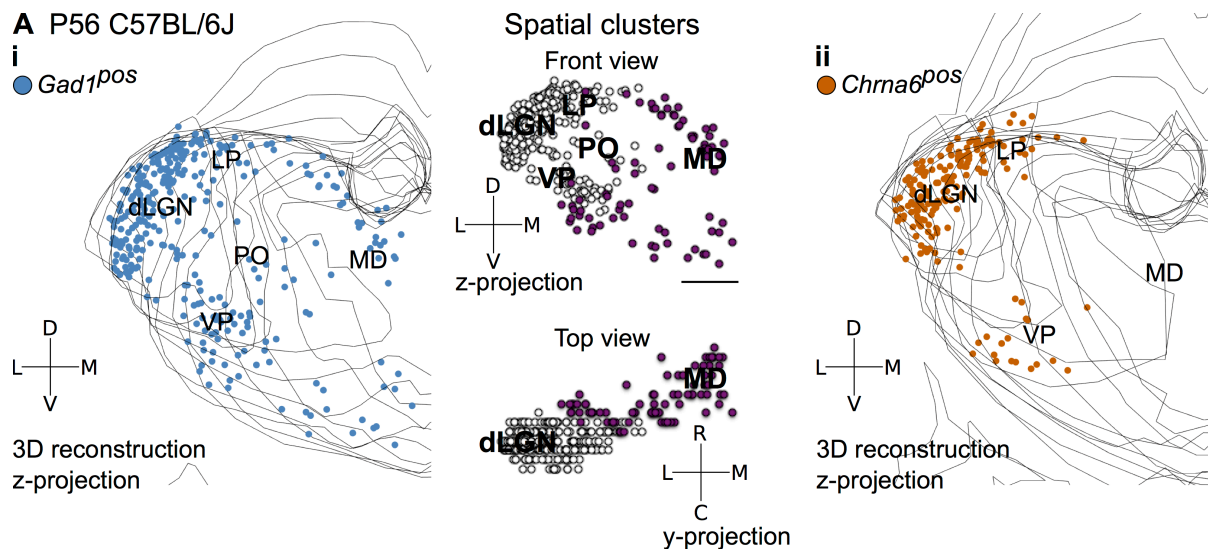

3

4 **Supplementary Figure 1. A.** 3D reconstruction of a representative P56 mouse thalamus  
5 from tracing every eight 25 $\mu$ m-thick coronal section, displayed as a z-projection and showing  
6 distribution of (i)  $Gad1^+$  and (ii)  $Chrna6^+$  cells. In (i), k-Means clustering was applied to the  
7 data using k=2 (highest silhouette score, 0.512); the resulting spatial clusters are shown as a  
8 z- and y-projection and colour-coded. One dot represents one neuron. ISH data was  
9 downloaded from the Allen Mouse Brain Atlas ( $\copyright$  2004 Allen Institute for Brain Science.  
10 Allen Mouse Brain Atlas. Available from: [mouse.brain-map.org](http://mouse.brain-map.org); Lein et al., 2006). **B.**  
11 Distribution of  $Gad1^+$  and  $Chrna6^+$  cells across TC nuclei (n=1 brain/marker) is compared to  
12 all  $Gad1^+$  and  $Sox14^+Gad1^+$  cells from P14  $Sox14^{GFP/+}$  thalamus (n=3 brains; see also Fig.  
13 1).  
14

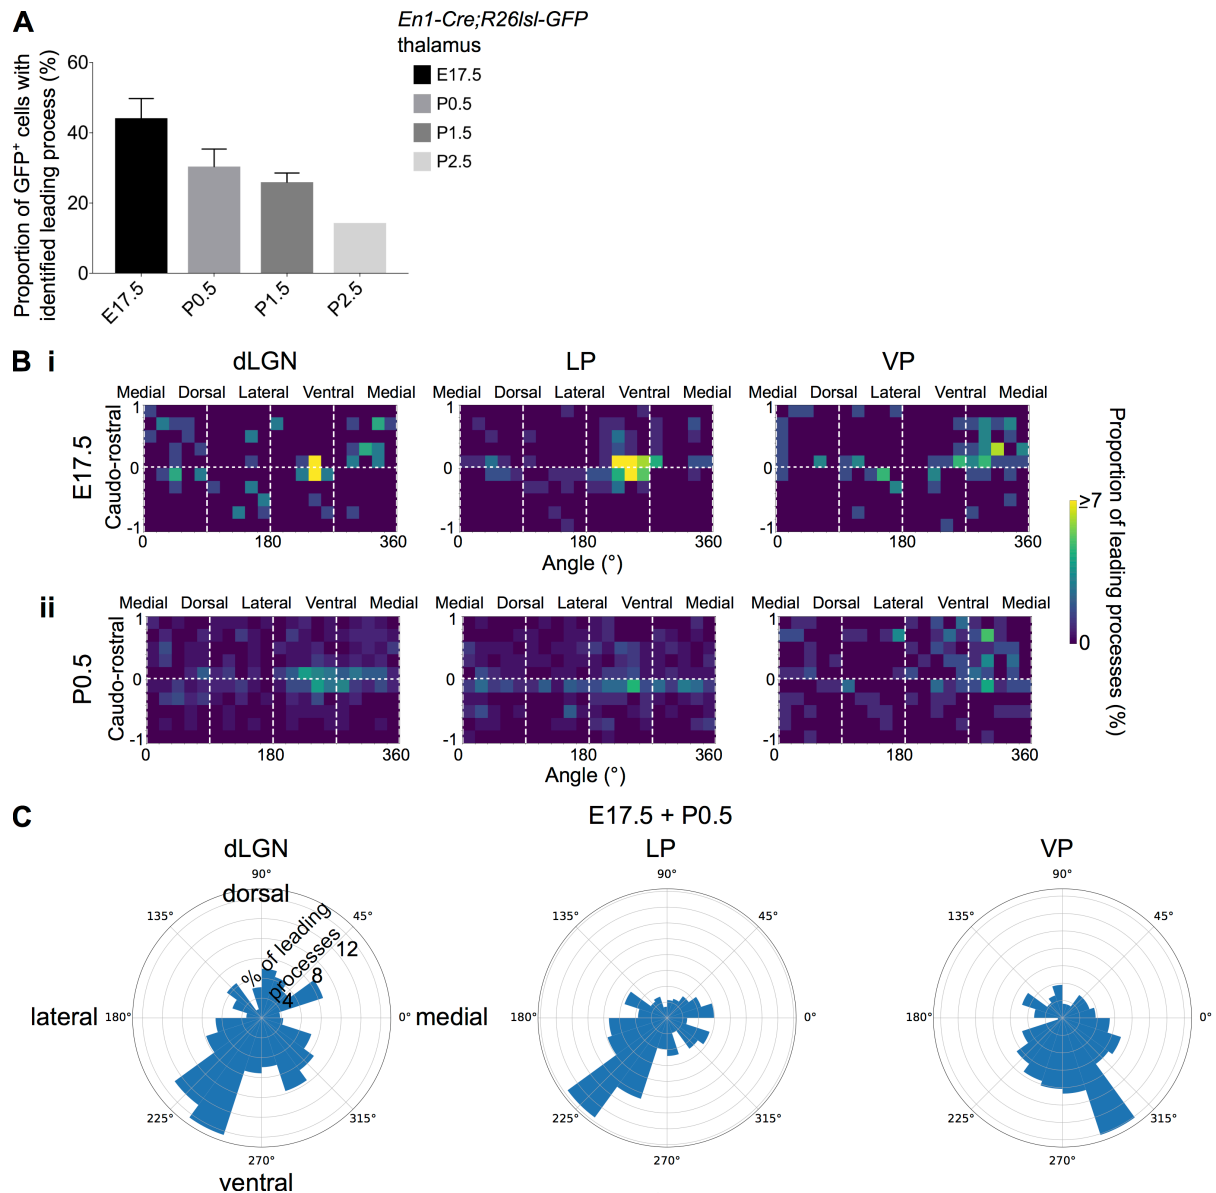

1  
2 **Supplementary Figure 2. A.** Proportion of GFP<sup>+</sup> cells in the dLGN, LP and VP combined,  
3 for which a leading process could be identified, in E17.5-P2.5 *En1-Cre;R26Isl-GFP* brains  
4 (mean±SE, n=3 brains/developmental stage, apart from P2.5 where n=1 brain). **B.**  
5 Frequency distribution of leading process orientation for GFP<sup>+</sup> cells in the dLGN, LP and VP  
6 at (i) E17.5 and (ii) P0.5 separately, represented in heat maps (n=3 brains/developmental  
7 stage). **C.** Polar histograms of leading process orientation in the latero-medial and ventro-  
8 dorsal plane for GFP<sup>+</sup> cells in the dLGN, LP and VP at E17.5 and P0 combined (n=3  
9 brains/developmental stage).  
10

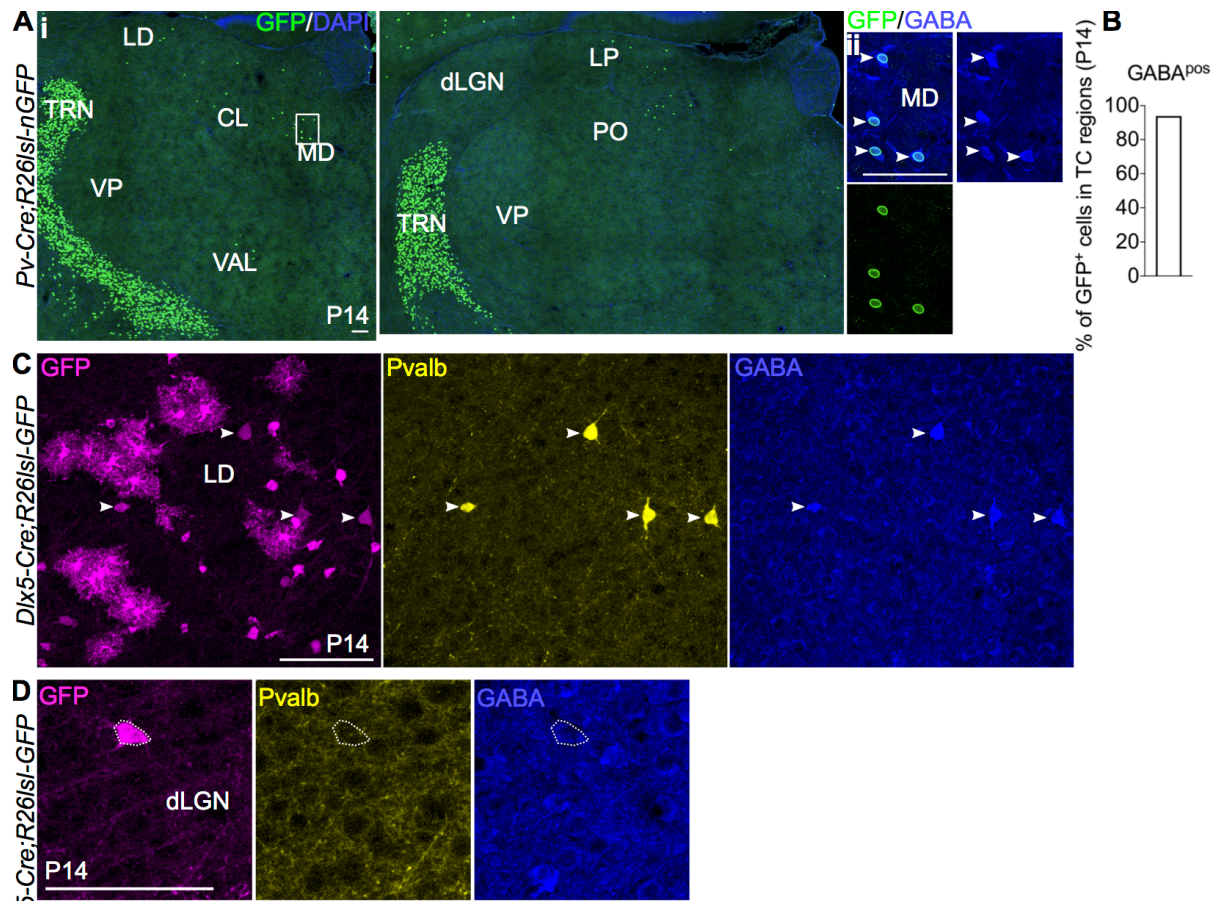

1  
2 **Supplementary Figure 3.** A. (i) Representative coronal sections of P14 *Pv-Cre;R26Isl-*  
3 *nGFP* thalamus with GFP<sup>+</sup> cells present in the MD, LD, CL, VAL, LP and PO (considering  
4 TC regions only). Scale bar, 100µm. (ii) GFP<sup>+</sup> cells in TC regions express GABA at P14.  
5 Scale bar, 100µm. B. Proportion of GFP<sup>+</sup> cells in TC regions co-expressing GABA at P14  
6 (mean, n=2 brains). C. Clusters of Pvalb<sup>+</sup>GABA<sup>-</sup>*Dlx5*<sup>+</sup> glia-like cells are observed across TC  
7 regions in the *Dlx5-Cre;R26Isl-GFP* line at P14, as shown for the LD. White arrows mark  
8 Pvalb<sup>+</sup>GABA<sup>-</sup>*Dlx5*<sup>+</sup> cells. Scale bar, 100µm. D. Pvalb<sup>-</sup>*Dlx5*<sup>+</sup> cells with neuronal morphology  
9 do not express GABA. Scale bar, 100µm.  
10

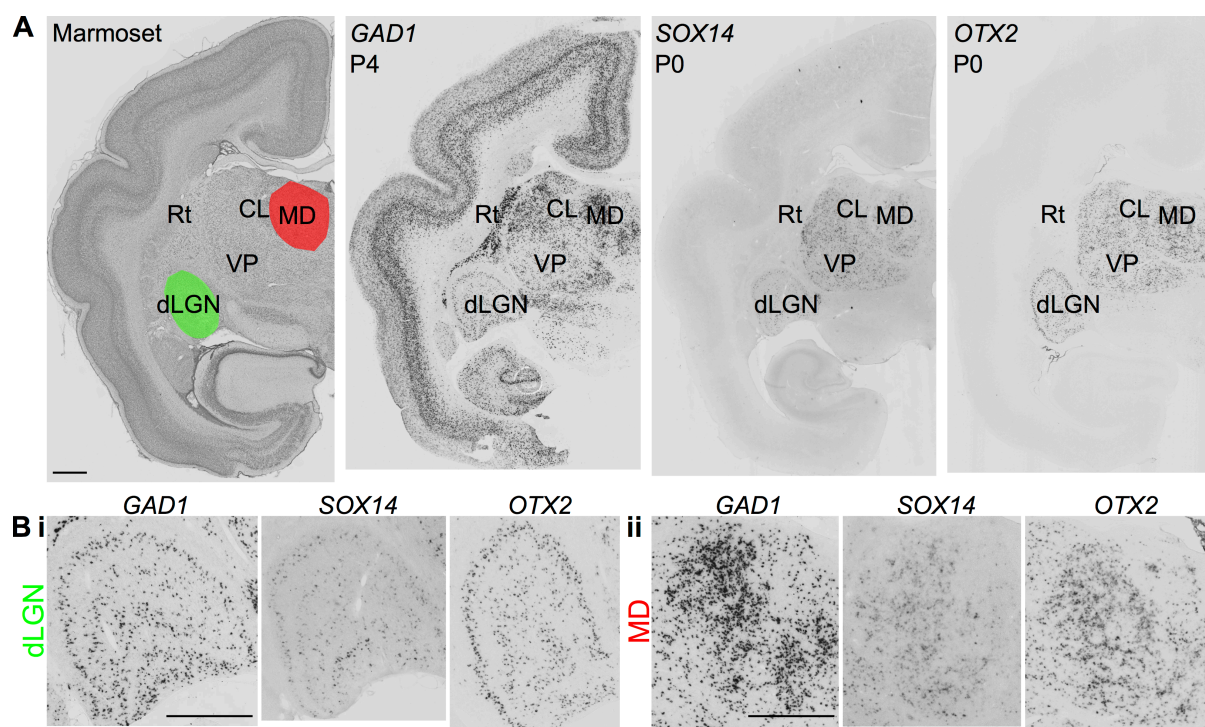

1  
2 **Supplementary Figure 4. A.** Representative coronal sections of P0-4 marmoset thalamus  
3 showing *GAD1*, *SOX14* and *OTX2* expression. Scale bar, 1000 $\mu$ m. **B.** Expression of *GAD1*,  
4 *SOX14* and *OTX2* in the marmoset (i) dLGN and (ii) MD. Scale bar, 1000 $\mu$ m. Source of ISH:  
5 the Marmoset Gene Atlas (Available from: <https://gene-atlas.brainminds.riken.jp>).
